# Supplementary material
Source: publisher figshare collection journal article supplement (https://geolsoc.figshare.com/ndownloader/files/30703149)
Supplement: Supplementary file 1 [file 30703149]

## Sheet: ALICUDI
SAMPLE	P	P inLvlblgl	P inLvlbrgl	P inLvlorgl	P inLvlgrgl	P inLvlclgl	P alt	P in Rp	P in Pm	Py	Py in Lvlblgl	Py in Lvlbrgl	Py in Lvlorgl	Py in Lvlgrgl	Py in Lvlclgl	Py alt	K	K in Lvlblgl	K in Lvlbrgl	K in Lvlorgl	K in Lvlgrgl	K in Lvlclgl	K in Rp	Ol	Ol inLvlblgl	Ol inLvlbrgl	Ol inLvlorgl	Ol inLvlgrgl	Ol alt	Hb	Hbalt	D(op)	Bt	Bt in Rm	Mu	Qm	Qp	Q in Rp	Lvlblgl	Lvlbrgl	Lvlorgl	Lvlgrgl	Lvlclgl	Lvmiblgl	Lvmibrgl	Lvmiorgl	Lvmigrgl	Lvmiclgl	Lvvblgl
AL-1-m	40	24	14	0	0	0	4	0	0	36	7	7	0	0	0	0	6	0	0	0	0	0	0	6	4	0	0	0	0	0	0	5	0	0	0	5	1	1	49	42	4	9	0	38	22	0	13	0	18
1	4	0	0	0	0	0	0	0	0	1	0	0	0	0	0	0	0	0	0	0	0	0	0	0	0	0	0	0	0	0	0	0	0	0	0	0	0	0	1	1	0	0	0	0	0	0	0	0	3
2	9	7	3	0	0	0	1	0	0	8	2	2	0	0	0	0	3	0	0	0	0	0	0	2	1	0	0	0	0	0	0	0	0	0	0	2	0	0	7	5	1	1	0	0	0	0	0	0	10
3	21	12	9	0	0	0	2	0	0	15	4	4	0	0	0	0	2	0	0	0	0	0	0	1	2	0	0	0	0	0	0	2	0	0	0	3	0	0	28	23	3	5	0	11	6	0	3	0	5
4	6	4	2	0	0	0	1	0	0	11	1	1	0	0	0	0	1	0	0	0	0	0	0	2	1	0	0	0	0	0	0	3	0	0	0	0	1	1	12	13	0	3	0	25	13	0	10	0	0
5	0	1	0	0	0	0	0	0	0	1	0	0	0	0	0	0	0	0	0	0	0	0	0	1	0	0	0	0	0	0	0	0	0	0	0	0	0	0	1	0	0	0	0	2	3	0	0	0	0
6	0	0	0	0	0	0	0	0	0	0	0	0	0	0	0	0	0	0	0	0	0	0	0	0	0	0	0	0	0	0	0	0	0	0	0	0	0	0	0	0	0	0	0	0	0	0	0	0	0
AL-2-m	50	19	18	0	0	0	0	3	0	16	26	29	0	0	0	0	4	6	6	0	0	0	0	2	8	0	0	0	0	0	0	0	0	0	0	0	0	0	56	85	0	0	3	27	18	0	0	0	9
1	3	0	0	0	0	0	0	0	0	3	2	0	0	0	0	0	0	0	0	0	0	0	0	0	0	0	0	0	0	0	0	0	0	0	0	0	0	0	4	4	0	0	0	0	0	0	0	0	2
2	11	3	3	0	0	0	0	2	0	4	7	6	0	0	0	0	1	1	1	0	0	0	0	1	2	0	0	0	0	0	0	0	0	0	0	0	0	0	11	14	0	0	0	0	1	0	0	0	4
3	23	14	14	0	0	0	0	2	0	8	11	16	0	0	0	0	2	4	4	0	0	0	0	1	3	0	0	0	0	0	0	0	0	0	0	0	0	0	35	45	0	0	1	10	4	0	0	0	1
4	9	2	1	0	0	0	0	0	0	1	4	6	0	0	0	0	1	1	1	0	0	0	0	0	2	0	0	0	0	0	0	0	0	0	0	0	0	0	5	18	0	0	2	15	12	0	0	0	2
5	4	0	0		0	0	0	0	0	0	2	1	0	0	0	0	0	0	0	0	0	0	0	0	1	0	0	0	0	0	0	0	0	0	0	0	0	0	1	4	0	0	0	2	1	0	0	0	0
6	0	0	0	0	0	0	0	0	0	0	0	0	0	0	0	0	0	0	0	0	0	0	0	0	0	0	0	0	0	0	0	0	0	0	0	0	0	0	0	0	0	0	0	0	0	0	0	0	0
AL-3-Vc	12	25	19	3	0	0	0	0	0	5	23	17	0	0	0	0	3	0	0	0	0	0	0	0	3	0	0	0	0	0	0	0	0	0	0	0	0	0	45	34	15	0	0	8	7	4	0	0	11
1	1	2	3	0	0	0	0	0	0	0	2	2	0	0	0	0	0	0	0	0	0	0	0	0	0	0	0	0	0	0	0	0	0	0	0	0	0	0	8	10	3	0	0	0	0	0	0	0	5
2	4	8	6	2	0	0	0	0	0	3	10	8	0	0	0	0	0	0	0	0	0	0	0	0	2	0	0	0	0	0	0	0	0	0	0	0	0	0	19	15	6	0	0	2	1	3	0	0	6
3	7	13	9	1	0	0	0	0	0	2	8	7	0	0	0	0	2	0	0	0	0	0	0	0	1	0	0	0	0	0	0	0	0	0	0	0	0	0	16	9	5	0	0	3	4	1	0	0	0
4	0	2	1	0	0	0	0	0	0	0	3	0	0	0	0	0	1	0	0	0	0	0	0	0	0	0	0	0	0	0	0	0	0	0	0	0	0	0	2	0	1	0	0	3	2	0	0	0	0
5	0	0	0	0	0	0	0	0	0	0	0	0	0	0	0	0	0	0	0	0	0	0	0	0	0	0	0	0	0	0	0	0	0	0	0	0	0	0	0	0	0	0	0	0	0	0	0	0	0
6	0	0	0	0	0	0	0	0	0	0	0	0	0	0	0	0	0	0	0	0	0	0	0	0	0	0	0	0	0	0	0	0	0	0	0	0	0	0	0	0	0	0	0	0	0	0	0	0	0
AL-3-C	14	36	23	10	0	0	0	0	0	25	19	10	0	0	0	0	4	0	0	0	0	0	0	0	8	7	0	0	0	0	0	0	0	0	0	0	0	0	79	55	13	0	0	28	20	11	0	0	22
1	2	6	2	3	0	0	0	0	0	3	1	1	0	0	0	0	0	0	0	0	0	0	0	0	3	0	0	0	0	0	0	0	0	0	0	0	0	0	9	8	3	0	0	1	2	1	0	0	9
2	6	14	11	5	0	0	0	0	0	11	6	6	0	0	0	0	1	0	0	0	0	0	0	0	3	2	0	0	0	0	0	0	0	0	0	0	0	0	28	18	6	0	0	9	6	3	0	0	7
3	5	15	10	2	0	0	0	0	0	9	9	2	0	0	0	0	3	0	0	0	0	0	0	0	2	4	0	0	0	0	0	0	0	0	0	0	0	0	39	28	4	0	0	15	9	5	0	0	5
4	1	1	0	0	0	0	0	0	0	2	3	1	0	0	0	0	0	0	0	0	0	0	0	0	0	1	0	0	0	0	0	0	0	0	0	0	0	0	3	1	0	0	0	3	3	2	0	0	1
5	0	0	0	0	0	0	0	0	0	0	0	0	0	0	0	0	0	0	0	0	0	0	0	0	0	0	0	0	0	0	0	0	0	0	0	0	0	0	0	0	0	0	0	0	0	0	0	0	0
6	0	0	0	0	0	0	0	0	0	0	0	0	0	0	0	0	0	0	0	0	0	0	0	0	0	0	0	0	0	0	0	0	0	0	0	0	0	0	0	0	0	0	0	0	0	0	0	0	0
AL-3-m	36	16	22	0	0	0	0	0	0	39	16	14	0	0	0	0	16	0	0	0	0	0	0	5	3	2	0	0	0	0	0	4	0	0	0	0	0	0	49	28	8	0	0	40	34	0	0	0	38
1	1	1	1	0	0	0	0	0	0	4	1	1	0	0	0	0	1	0	0	0	0	0	0	0	0	0	0	0	0	0	0	0	0	0	0	0	0	0	4	1	1	0	0	2	3	0	0	0	10
2	12	3	4	0	0	0	0	0	0	17	4	4	0	0	0	0	3	0	0	0	0	0	0	3	2	0	0	0	0	0	0	1	0	0	0	0	0	0	11	10	3	0	0	9	6	0	0	0	21
3	21	11	12	0	0	0	0	0	0	15	10	8	0	0	0	0	10	0	0	0	0	0	0	2	1	1	0	0	0	0	0	3	0	0	0	0	0	0	24	14	4	0	0	20	17	0	0	0	7
4	2	1	5	0	0	0	0	0	0	3	1	1	0	0	0	0	2	0	0	0	0	0	0	0	0	1	0	0	0	0	0	0	0	0	0	0	0	0	9	3	0	0	0	8	7	0	0	0	0
5	0	0	0	0	0	0	0	0	0	0	0	0	0	0	0	0	0	0	0	0	0	0	0	0	0	0	0	0	0	0	0	0	0	0	0	0	0	0	1	0	0	0	0	1	1	0	0	0	0
6	0	0	0	0	0	0	0	0	0	0	0	0	0	0	0	0	0	0	0	0	0	0	0	0	0	0	0	0	0	0	0	0	0	0	0	0	0	0	0	0	0	0	0	0	0	0	0	0	0
AL-3-f	45	22	9	6	0	0	0	0	0	53	9	13	0	0	0	0	11	0	0	0	0	0	0	6	0	0	0	0	0	0	0	0	0	0	0	0	0	0	29	20	0	0	0	68	54	5	0	0	26
1	3	0	0	0	0	0	0	0	0	3	0	0	0	0	0	0	0	0	0	0	0	0	0	0	0	0	0	0	0	0	0	0	0	0	0	0	0	0	0	2	0	0	0	2	2	0	0	0	10
2	17	7	3	1	0	0	0	0	0	18	1	4	0	0	0	0	3	0	0	0	0	0	0	1	0	0	0	0	0	0	0	0	0	0	0	0	0	0	5	4	0	0	0	15	11	1	0	0	12
3	21	13	6	3	0	0	0	0	0	26	5	7	0	0	0	0	7	0	0	0	0	0	0	2	0	0	0	0	0	0	0	0	0	0	0	0	0	0	18	12	0	0	0	33	29	3	0	0	4
4	4	2	0	1	0	0	0	0	0	4	3	2	0	0	0	0	1	0	0	0	0	0	0	3	0	0	0	0	0	0	0	0	0	0	0	0	0	0	6	2	0	0	0	17	12	1	0	0	0
5	0	0	0	0	0	0	0	0	0	2	0	0	0	0	0	0	0	0	0	0	0	0	0	0	0	0	0	0	0	0	0	0	0	0	0	0	0	0	0	0	0	0	0	1	0	0	0	0	0
6	0	0	0	1	0	0	0	0	0	0	0	0	0	0	0	0	0	0	0	0	0	0	0	0	0	0	0	0	0	0	0	0	0	0	0	0	0	0	0	0	0	0	0	0	0	0	0	0	0
AL-3-Vf	60	7	0	0	0	0	0	0	0	72	0	0	0	0	0	0	0	0	0	0	0	0	0	17	0	0	0	0	0	0	0	0	1	0	0	0	0	0	18	14	0	0	0	63	51	13	0	0	46
1	0	0	0	0	0	0	0	0	0	1	0	0	0	0	0	0	0	0	0	0	0	0	0	0	0	0	0	0	0	0	0	0	0	0	0	0	0	0	0	0	0	0	0	1	0	0	0	0	4
2	24	1	0	0	0	0	0	0	0	28	0	0	0	0	0	0	0	0	0	0	0	0	0	6	0	0	0	0	0	0	0	0	0	0	0	0	0	0	5	4	0	0	0	10	6	1	0	0	28
3	34	4	0	0	0	0	0	0	0	39	0	0	0	0	0	0	0	0	0	0	0	0	0	6	0	0	0	0	0	0	0	0	1	0	0	0	0	0	11	10	0	0	0	34	24	7	0	0	12
4	2	2	0	0	0	0	0	0	0	4	0	0	0	0	0	0	0	0	0	0	0	0	0	4	0	0	0	0	0	0	0	0	0	0	0	0	0	0	2	0	0	0	0	18	20	5	0	0	1
5	0	0	0	0	0	0	0	0	0	0	0	0	0	0	0	0	0	0	0	0	0	0	0	1	0	0	0	0	0	0	0	0	0	0	0	0	0	0	0	0	0	0	0	0	1	0	0	0	1
6	0	0	0	0	0	0	0	0	0	0	0	0	0	0	0	0	0	0	0	0	0	0	0	0	0	0	0	0	0	0	0	0	0	0	0	0	0	0	0	0	0	0	0	0	0	0	0	0	0
AL-4-C	12	48	33	0	0	0	0	0	0	19	19	13	0	0	0	0	0	0	0	0	0	0	0	0	0	0	0	0	0	0	0	0	0	0	0	0	0	0	69	63	0	0	0	42	31	0	0	0	28
1	1	3	1	0	0	0	0	0	0	0	0	0	0	0	0	0	0	0	0	0	0	0	0	0	0	0	0	0	0	0	0	0	0	0	0	0	0	0	8	4	0	0	0	0	0	0	0	0	8
2	3	8	7	0	0	0	0	0	0	6	8	3	0	0	0	0	0	0	0	0	0	0	0	0	0	0	0	0	0	0	0	0	0	0	0	0	0	0	23	23	0	0	0	10	5	0	0	0	12
3	8	24	19	0	0	0	0	0	0	13	10	10	0	0	0	0	0	0	0	0	0	0	0	0	0	0	0	0	0	0	0	0	0	0	0	0	0	0	24	27	0	0	0	22	13	0	0	0	8
4	0	9	6	0	0	0	0	0	0	0	1	0	0	0	0	0	0	0	0	0	0	0	0	0	0	0	0	0	0	0	0	0	0	0	0	0	0	0	11	7	0	0	0	10	13	0	0	0	0
5	0	4	0	0	0	0	0	0	0	0	0	0	0	0	0	0	0	0	0	0	0	0	0	0	0	0	0	0	0	0	0	0	0	0	0	0	0	0	3	2	0	0	0	0	0	0	0	0	0
6	0	0	0	0	0	0	0	0	0	0	0	0	0	0	0	0	0	0	0	0	0	0	0	0	0	0	0	0	0	0	0	0	0	0	0	0	0	0	0	0	0	0	0	0	0	0	0	0	0
AL-5-m	33	41	28	8	0	0	0	0	0	35	25	19	7	0	0	0	0	0	0	0	0	0	0	9	5	0	0	0	0	0	0	0	0	0	0	0	0	0	55	30	11	0	0	30	14	0	0	0	29
1	2	1	0	1	0	0	0	0	0	3	2	3	1	0	0	0	0	0	0	0	0	0	0	0	0	0	0	0	0	0	0	0	0	0	0	0	0	0	3	3	2	0	0	0	0	0	0	0	5
2	10	11	9	3	0	0	0	0	0	17	5	8	3	0	0	0	0	0	0	0	0	0	0	2	2	0	0	0	0	0	0	0	0	0	0	0	0	0	10	8	4	0	0	3	2	0	0	0	17
3	13	19	16	4	0	0	0	0	0	10	14	7	2	0	0	0	0	0	0	0	0	0	0	3	3	0	0	0	0	0	0	0	0	0	0	0	0	0	30	19	5	0	0	20	7	0	0	0	6
4	4	8	3	0	0	0	0	0	0	3	4	1	1	0	0	0	0	0	0	0	0	0	0	2	0	0	0	0	0	0	0	0	0	0	0	0	0	0	9	0	0	0	0	7	5	0	0	0	1
5	4	2	0	0	0	0	0	0	0	2	0	0	0	0	0	0	0	0	0	0	0	0	0	2	0	0	0	0	0	0	0	0	0	0	0	0	0	0	3	0	0	0	0	0	0	0	0	0	0
6	0	0	0	0	0	0	0	0	0	0	0	0	0	0	0	0	0	0	0	0	0	0	0	0	0	0	0	0	0	0	0	0	0	0	0	0	0	0	0	0	0	0	0	0	0	0	0	0	0
AL-6-m	22	33	30	0	0	0	0	0	0	43	15	12	0	0	0	0	0	0	0	0	0	0	0	2	0	0	0	0	0	0	0	0	1	0	0	0	0	0	64	50	6	11	0	40	33	0	6	0	19
1	1	0	1	0	0	0	0	0	0	4	1	1	0	0	0	0	0	0	0	0	0	0	0	0	0	0	0	0	0	0	0	0	0	0	0	0	0	0	7	2	0	1	0	0	0	0	0	0	1
2	7	8	9	0	0	0	0	0	0	11	3	2	0	0	0	0	0	0	0	0	0	0	0	0	0	0	0	0	0	0	0	0	0	0	0	0	0	0	14	14	1	2	0	3	4	0	0	0	11
3	12	20	14	0	0	0	0	0	0	19	9	7	0	0	0	0	0	0	0	0	0	0	0	0	0	0	0	0	0	0	0	0	1	0	0	0	0	0	24	26	4	7	0	14	9	0	2	0	6
4	2	4	4	0	0	0	0	0	0	7	2	2	0	0	0	0	0	0	0	0	0	0	0	1	0	0	0	0	0	0	0	0	0	0	0	0	0	0	12	6	1	1	0	23	20	0	4	0	1
5	0	1	2	0	0	0	0	0	0	2	0	0	0	0	0	0	0	0	0	0	0	0	0	1	0	0	0	0	0	0	0	0	0	0	0	0	0	0	7	2	0	0	0	0	0	0	0	0	0
6	0	0	0	0	0	0	0	0	0	0	0	0	0	0	0	0	0	0	0	0	0	0	0	0	0	0	0	0	0	0	0	0	0	0	0	0	0	0	0	0	0	0	0	0	0	0	0	0	0
AL-7-m	27	23	20	0	0	0	0	0	0	61	23	19	0	0	0	0	0	0	0	0	0	0	0	8	0	0	0	0	0	0	0	0	0	0	0	0	0	0	66	43	6	8	0	32	22	0	4	0	20
1	1	2	2	0	0	0	0	0	0	4	1	0	0	0	0	0	0	0	0	0	0	0	0	0	0	0	0	0	0	0	0	0	0	0	0	0	0	0	6	2	0	1	0	0	0	0	0	0	3
2	6	4	5	0	0	0	0	0	0	27	6	4	0	0	0	0	0	0	0	0	0	0	0	2	0	0	0	0	0	0	0	0	0	0	0	0	0	0	20	13	3	4	0	2	2	0	1	0	12
3	16	14	12	0	0	0	0	0	0	22	12	13	0	0	0	0	0	0	0	0	0	0	0	4	0	0	0	0	0	0	0	0	0	0	0	0	0	0	29	23	3	2	0	13	4	0	1	0	5
4	3	3	1	0	0	0	0	0	0	7	4	2	0	0	0	0	0	0	0	0	0	0	0	2	0	0	0	0	0	0	0	0	0	0	0	0	0	0	9	4	0	1	0	15	13	0	2	0	0
5	1	0	0	0	0	0	0	0	0	1	0	0	0	0	0	0	0	0	0	0	0	0	0	0	0	0	0	0	0	0	0	0	0	0	0	0	0	0	2	1	0	0	0	2	3	0	0	0	0
6	0	0	0	0	0	0	0	0	0	0	0	0	0	0	0	0	0	0	0	0	0	0	0	0	0	0	0	0	0	0	0	0	0	0	0	0	0	0	0	0	0	0	0	0	0	0	0	0	0
	*Key to Grain Shape Categories. 1 = very angular; 2 = angular; 3 = sub-angular; 4 = subrounded; 5 = rounded; 6 = well rounded; Vc: very coarse sand fraction; C: coarse sand fraction; m: medium sand fraction; f: fine sand fraction; Vf: very fine sand fraction.
[truncated: 14 more columns]

## Sheet: FILICUDI
SAMPLE	P	P inLvlblgl	P inLvlbrgl	P inLvlorgl	P inLvlgrgl	P inLvlclgl	P alt	P in Rp	P in Pm	Py	Py in Lvlblgl	Py in Lvlbrgl	Py in Lvlorgl	Py in Lvlgrgl	Py in Lvlclgl	Py alt	K	K in Lvlblgl	Ol	Ol inLvlblgl	Ol inLvlbrgl	Ol inLvlorgl	Ol inLvlgrgl	Ol alt	Hb	Hbalt	Hb in Lvlblgl	Hb in Lvlbrgl	Hb in Lvlgrgl	Hb in Lvlclgl	Hb in Rp	Gr	Ru	Ru in Lvlblgl	Ru in Lvlbrgl	D(Op)	D(Op) in Lvlbrgl	D(Op) in Pmcl	Bt	Qm	Qp	Q in Rp	Q in Rm	Lvlblgl	Lvlbrgl	Lvlorgl	Lvlgrgl	Lvlclgl	Lvmiblgl
Fi-1-m	13	9	17	0	0	0	0	0	0	87	10	5	0	0	0	4	0	0	4	1	2	0	0	0	4	0	0	0	0	0	0	0	0	0	0	14	0	0	0	0	0	0	2	31	39	0	17	12	31
1	0	0	0	0	0	0	0	0	0	3	0	0	0	0	0	0	0	0	0	0	0	0	0	0	0	0	0	0	0	0	0	0	0	0	0	0	0	0	0	0	0	0	0	0	0	0	0	0	0
2	4	3	3	0	0	0	0	0	0	31	0	0	0	0	0	1	0	0	1	0	0	0	0	0	3	0	0	0	0	0	0	0	0	0	0	1	0	0	0	0	0	0	0	3	4	0	3	1	1
3	8	5	7	0	0	0	0	0	0	32	7	2	0	0	0	3	0	0	2	0	1	0	0	1	1	0	0	0	0	0	0	0	0	0	0	7	0	0	0	0	0	0	1	18	16	0	8	6	16
4	1	1	6	0	0	0	0	0	0	19	3	3	0	0	0	0	0	0	1	0	1	0	0	0	0	0	0	0	0	0	0	0	0	0	0	6	0	0	0	0	0	0	1	10	18	0	6	3	14
5	0	0	1	0	0	0	0	0	0	1	0	0	0	0	0	0	0	0	0	1	0	0	0	0	0	0	0	0	0	0	0	0	0	0	0	0	0	0	0	0	0	0	0	0	1	0	0	2	0
6	0	0	0	0	0	0	0	0	0	0	0	0	0	0	0	0	0	0	0	0	0	0	0	0	0	0	0	0	0	0	0	0	0	0	0	0	0	0	0	0	0	0	0	0	0	0	0	0	0
Fi-2-m	32	17	29	0	0	0	0	0	0	58	0	19	0	0	0	0	0	0	0	0	0	0	0	0	0	0	0	3	0	0	0	0	0	0	0	0	6	3	4	0	0	4	0	24	80	0	0	7	26
1	0	0	0	0	0	0	0	0	0	1	0	0	0	0	0	0	0	0	0	0	0	0	0	0	0	0	0	0	0	0	0	0	0	0	0	0	0	0	0	0	0	0	0	0	0	0	0	0	0
2	3	6	8	0	0	0	0	0	0	15	0	2	0	0	0	0	0	0	0	0	0	0	0	0	0	0	0	2	0	0	0	0	0	0	0	0	0	2	2	0	0	0	0	6	9	0	0	3	1
3	14	7	11	0	0	0	0	0	0	22	0	12	0	0	0	0	0	0	0	0	0	0	0	0	0	0	0	1	0	0	0	0	0	0	0	0	3	1	2	0	0	1	0	8	33	0	0	2	9
4	15	2	10	0	0	0	0	0	0	18	0	5	0	0	0	0	0	0	0	0	0	0	0	0	0	0	0	0	0	0	0	0	0	0	0	0	1	0	0	0	0	2	0	10	32	0	0	2	14
5	0	2	0	0	0	0	0	0	0	2	0	0	0	0	0	0	0	0	0	0	0	0	0	0	0	0	0	0	0	0	0	0	0	0	0	0	1	0	0	0	0	0	0	0	6	0	0	0	2
6	0	0	0	0	0	0	0	0	0	0	0	0	0	0	0	0	0	0	0	0	0	0	0	0	0	0	0	0	0	0	0	0	0	0	0	0	1	0	0	0	0	1	0	0	0	0	0	0	0
Fi-3-Vc	5	15	20	0	0	0	0	1	0	9	10	23	0	0	0	0	0	0	0	0	0	0	0	0	0	0	0	0	0	0	0	0	0	1	0	0	0	0	0	0	0	0	0	59	81	1	0	0	6
1	0	0	2	0	0	0	0	0	0	1	0	0	0	0	0	0	0	0	0	0	0	0	0	0	0	0	0	0	0	0	0	0	0	0	0	0	0	0	0	0	0	0	0	2	4	0	0	0	0
2	3	7	9	0	0	0	0	0	0	5	5	9	0	0	0	0	0	0	0	0	0	0	0	0	0	0	0	0	0	0	0	0	0	0	0	0	0	0	0	0	0	0	0	30	40	1	0	0	1
3	2	8	8	0	0	0	0	1	0	3	4	13	0	0	0	0	0	0	0	0	0	0	0	0	0	0	0	0	0	0	0	0	0	0	0	0	0	0	0	0	0	0	0	24	33	0	0	0	2
4	0	0	1	0	0	0	0	0	0	0	1	1	0	0	0	0	0	0	0	0	0	0	0	0	0	0	0	0	0	0	0	0	0	1	0	0	0	0	0	0	0	0	0	3	3	0	0	0	3
5	0	0	0	0	0	0	0	0	0	0	0	0	0	0	0	0	0	0	0	0	0	0	0	0	0	0	0	0	0	0	0	0	0	0	0	0	0	0	0	0	0	0	0	0	1	0	0	0	0
6	0	0	0	0	0	0	0	0	0	0	0	0	0	0	0	0	0	0	0	0	0	0	0	0	0	0	0	0	0	0	0	0	0	0	0	0	0	0	0	0	0	0	0	0	0	0	0	0	0
Fi-3-C	19	63	49	0	0	0	0	0	0	9	21	15	0	0	0	0	0	0	0	1	0	0	0	0	0	0	0	0	0	0	0	0	1	1	2	0	0	0	0	0	0	0	0	69	61	3	13	0	20
1	0	4	2	0	0	0	0	0	0	2	0	1	0	0	0	0	0	0	0	0	0	0	0	0	0	0	0	0	0	0	0	0	0	0	0	0	0	0	0	0	0	0	0	4	0	0	1	0	1
2	7	21	13	0	0	0	0	0	0	3	4	3	0	0	0	0	0	0	0	1	0	0	0	0	0	0	0	0	0	0	0	0	0	0	0	0	0	0	0	0	0	0	0	15	19	2	3	0	3
3	9	23	18	0	0	0	0	0	0	3	12	7	0	0	0	0	0	0	0	0	0	0	0	0	0	0	0	0	0	0	0	0	1	1	2	0	0	0	0	0	0	0	0	30	29	1	7	0	6
4	3	14	12	0	0	0	0	0	0	1	4	4	0	0	0	0	0	0	0	0	0	0	0	0	0	0	0	0	0	0	0	0	0	0	0	0	0	0	0	0	0	0	0	19	13	0	2	0	10
5	0	1	3	0	0	0	0	0	0	0	1	0	0	0	0	0	0	0	0	0	0	0	0	0	0	0	0	0	0	0	0	0	0	0	0	0	0	0	0	0	0	0	0	1	0	0	0	0	0
6	0	0	1	0	0	0	0	0	0	0	0	0	0	0	0	0	0	0	0	0	0	0	0	0	0	0	0	0	0	0	0	0	0	0	0	0	0	0	0	0	0	0	0	0	0	0	0	0	0
Fi-3-m	35	52	15	0	0	0	4	0	0	24	10	8	0	0	0	0	0	0	0	2	4	0	0	0	0	0	0	0	0	0	0	0	0	0	0	0	0	0	0	0	0	0	0	54	50	0	0	8	36
1	0	0	0	0	0	0	0	0	0	0	0	0	0	0	0	0	0	0	0	0	0	0	0	0	0	0	0	0	0	0	0	0	0	0	0	0	0	0	0	0	0	0	0	2	4	0	0	0	0
2	4	10	5	0	0	0	0	0	0	4	2	4	0	0	0	0	0	0	0	0	0	0	0	0	0	0	0	0	0	0	0	0	0	0	0	0	0	0	0	0	0	0	0	18	10	0	0	2	2
3	22	32	8	0	0	0	2	0	0	12	4	2	0	0	0	0	0	0	0	2	4	0	0	0	0	0	0	0	0	0	0	0	0	0	0	0	0	0	0	0	0	0	0	18	20	0	0	4	16
4	9	8	2	0	0	0	2	0	0	8	4	2	0	0	0	0	0	0	0	0	0	0	0	0	0	0	0	0	0	0	0	0	0	0	0	0	0	0	0	0	0	0	0	14	12	0	0	2	16
5	0	2	0	0	0	0	0	0	0	0	0	0	0	0	0	0	0	0	0	0	0	0	0	0	0	0	0	0	0	0	0	0	0	0	0	0	0	0	0	0	0	0	0	2	4	0	0	0	2
6	0	0	0	0	0	0	0	0	0	0	0	0	0	0	0	0	0	0	0	0	0	0	0	0	0	0	0	0	0	0	0	0	0	0	0	0	0	0	0	0	0	0	0	0	0	0	0	0	0
Fi-3-f	35	18	14	0	0	0	0	0	0	26	20	10	0	0	0	0	0	0	0	0	0	0	0	0	0	0	0	0	0	0	0	0	3	0	0	0	0	0	0	0	0	0	0	48	52	0	0	0	77
1	3	1	0	0	0	0	0	0	0	1	0	0	0	0	0	0	0	0	0	0	0	0	0	0	0	0	0	0	0	0	0	0	0	0	0	0	0	0	0	0	0	0	0	8	6	0	0	0	2
2	13	6	4	0	0	0	0	0	0	9	6	2	0	0	0	0	0	0	0	0	0	0	0	0	0	0	0	0	0	0	0	0	2	0	0	0	0	0	0	0	0	0	0	4	14	0	0	0	12
3	17	8	9	0	0	0	0	0	0	10	7	7	0	0	0	0	0	0	0	0	0	0	0	0	0	0	0	0	0	0	0	0	1	0	0	0	0	0	0	0	0	0	0	23	24	0	0	0	23
4	2	3	1	0	0	0	0	0	0	3	7	1	0	0	0	0	0	0	0	0	0	0	0	0	0	0	0	0	0	0	0	0	0	0	0	0	0	0	0	0	0	0	0	12	8	0	0	0	36
5	0	0	0	0	0	0	0	0	0	2	0	0	0	0	0	0	0	0	0	0	0	0	0	0	0	0	0	0	0	0	0	0	0	0	0	0	0	0	0	0	0	0	0	1	0	0	0	0	3
6	0	0	0	0	0	0	0	0	0	1	0	0	0	0	0	0	0	0	0	0	0	0	0	0	0	0	0	0	0	0	0	0	0	0	0	0	0	0	0	0	0	0	0	0	0	0	0	0	1
Fi-3-Vf	17	0	0	0	0	0	0	0	0	20	0	0	0	0	0	0	0	0	0	0	0	0	0	0	0	0	0	0	0	0	0	0	0	0	0	20	0	0	0	0	0	0	0	30	26	0	0	0	104
1	0	0	0	0	0	0	0	0	0	1	0	0	0	0	0	0	0	0	0	0	0	0	0	0	0	0	0	0	0	0	0	0	0	0	0	1	0	0	0	0	0	0	0	0	0	0	0	0	0
2	4	0	0	0	0	0	0	0	0	8	0	0	0	0	0	0	0	0	0	0	0	0	0	0	0	0	0	0	0	0	0	0	0	0	0	8	0	0	0	0	0	0	0	7	4	0	0	0	7
3	12	0	0	0	0	0	0	0	0	10	0	0	0	0	0	0	0	0	0	0	0	0	0	0	0	0	0	0	0	0	0	0	0	0	0	10	0	0	0	0	0	0	0	14	14	0	0	0	37
4	1	0	0	0	0	0	0	0	0	1	0	0	0	0	0	0	0	0	0	0	0	0	0	0	0	0	0	0	0	0	0	0	0	0	0	1	0	0	0	0	0	0	0	9	6	0	0	0	47
5	0	0	0	0	0	0	0	0	0	0	0	0	0	0	0	0	0	0	0	0	0	0	0	0	0	0	0	0	0	0	0	0	0	0	0	0	0	0	0	0	0	0	0	0	2	0	0	0	13
6	0	0	0	0	0	0	0	0	0	0	0	0	0	0	0	0	0	0	0	0	0	0	0	0	0	0	0	0	0	0	0	0	0	0	0	0	0	0	0	0	0	0	0	0	0	0	0	0	0
Fi-4-m	30	14	14	0	6	6	0	0	0	32	7	0	0	0	0	0	0	0	0	0	0	0	0	0	32	0	0	4	7	0	0	0	0	0	0	22	0	0	0	0	0	0	0	52	54	0	19	0	43
1	1	0	1	0	0	0	0	0	0	2	0	0	0	0	0	0	0	0	0	0	0	0	0	0	0	0	0	0	0	0	0	0	0	0	0	0	0	0	0	0	0	0	0	4	5	0	1	0	1
2	9	4	5	0	2	2	0	0	0	13	2	0	0	0	0	0	0	0	0	0	0	0	0	0	14	0	0	2	3	0	0	0	0	0	0	2	0	0	0	0	0	0	0	17	19	0	6	0	4
3	14	9	8	0	4	4	0	0	0	15	5	0	0	0	0	0	0	0	0	0	0	0	0	0	15	0	0	2	4	0	0	0	0	0	0	7	0	0	0	0	0	0	0	20	26	0	9	0	13
4	6	1	0	0	0	0	0	0	0	2	0	0	0	0	0	0	0	0	0	0	0	0	0	0	3	0	0	0	0	0	0	0	0	0	0	13	0	0	0	0	0	0	0	11	4	0	3	0	25
5	0	0	0	0	0	0	0	0	0	0	0	0	0	0	0	0	0	0	0	0	0	0	0	0	0	0	0	0	0	0	0	0	0	0	0	0	0	0	0	0	0	0	0	0	0	0	0	0	0
6	0	0	0	0	0	0	0	0	0	0	0	0	0	0	0	0	0	0	0	0	0	0	0	0	0	0	0	0	0	0	0	0	0	0	0	0	0	0	0	0	0	0	0	0	0	0	0	0	0
	*Key to Grain Shape Categories. 1 = very angular; 2 = angular; 3 = sub-angular; 4 = subrounded; 5 = rounded; 6 = well rounded; Vc: very coarse sand fraction; C: coarse sand fraction; m: medium sand fraction; f: fine sand fraction; Vf: very fine sand fraction.
[truncated: 19 more columns]

## Sheet: SALINA
SAMPLE	P	P inLvlblgl	P inLvlbrgl	P inLvlorgl	P inLvlgrgl	P inLvlclgl	P alt	P in Rp	P in Pmclgl	Py	Py in Lvlblgl	Py in Lvlbrgl	Py in Lvlorgl	Py in Lvlgrgl	Py in Lvlclgl	Py alt	K	K in Lvlblgl	K in Lvlbrgl	K in Lvlorgl	K in Lvlgrgl	K in Lvlclgl	K in Rp	Ol	Ol inLvlblgl	Ol inLvlbrgl	Ol inLvlorgl	Ol inLvlgrgl	Ol alt	Hb	Hbalt	Hb in Lvlblgl	Hb in Lvlbrgl	Hb in Lvlgrgl	Hb in Lvlclgl	Hb in Rp	Gr	D(Op)	Bt	Bt in Rp	Bt in Rm	Mu	Mu in Rm	Qm	Qp	Q in Rp	Q in Rm	Lvlblgl	Lvlbrgl
SA-1-Vc	0	28	27	0	36	0	0	0	0	0	22	17	0	19	0	0	0	0	0	0	0	0	0	0	0	0	0	0	0	0	0	0	0	2	0	0	0	0	0	2	0	0	0	0	0	2	0	38	32
1	0	3	1	0	1	0	0	0	0	0	3	1	0	2	0	0	0	0	0	0	0	0	0	0	0	0	0	0	0	0	0	0	0	0	0	0	0	0	0	0	0	0	0	0	0	0	0	3	1
2	0	16	11	0	7	0	0	0	0	0	12	8	0	9	0	0	0	0	0	0	0	0	0	0	0	0	0	0	0	0	0	0	0	0	0	0	0	0	0	0	0	0	0	0	0	0	0	19	10
3	0	6	12	0	14	0	0	0	0	0	7	7	0	7	0	0	0	0	0	0	0	0	0	0	0	0	0	0	0	0	0	0	0	0	0	0	0	0	0	1	0	0	0	0	0	1	0	13	12
4	0	2	3	0	12	0	0	0	0	0	0	1	0	1	0	0	0	0	0	0	0	0	0	0	0	0	0	0	0	0	0	0	0	0	0	0	0	0	0	1	0	0	0	0	0	1	0	3	9
5	0	1	0	0	2	0	0	0	0	0	0	0	0	0	0	0	0	0	0	0	0	0	0	0	0	0	0	0	0	0	0	0	0	0	0	0	0	0	0	0	0	0	0	0	0	0	0	0	0
6	0	0	0	0	0	0	0	0	0	0	0	0	0	0	0	0	0	0	0	0	0	0	0	0	0	0	0	0	0	0	0	0	0	0	0	0	0	0	0	0	0	0	0	0	0	0	0	0	0
SA-1-C	16	35	20	2	14	0	0	2	0	12	12	7	0	3	0	0	0	0	0	0	0	0	0	0	0	0	0	0	0	0	0	0	0	0	0	0	0	0	0	0	1	1	1	6	2	0	2	47	37
1	3	4	1	0	1	0	0	0	0	4	2	2	0	0	0	0	0	0	0	0	0	0	0	0	0	0	0	0	0	0	0	0	0	0	0	0	0	0	0	0	0	0	0	0	0	0	0	6	3
2	8	12	7	0	3	0	0	0	0	7	5	4	0	1	0	0	0	0	0	0	0	0	0	0	0	0	0	0	0	0	0	0	0	0	0	0	0	0	0	0	0	0	0	4	1	0	1	19	11
3	4	11	8	1	7	0	0	1	0	1	5	1	0	1	0	0	0	0	0	0	0	0	0	0	0	0	0	0	0	0	0	0	0	0	0	0	0	0	0	0	0	1	0	1	1	0	0	13	13
4	1	8	4	1	3	0	0	1	0	0	0	0	0	1	0	0	0	0	0	0	0	0	0	0	0	0	0	0	0	0	0	0	0	0	0	0	0	0	0	0	1	0	1	1	0	0	1	8	8
5	0	0	0	0	0	0	0	0	0	0	0	0	0	0	0	0	0	0	0	0	0	0	0	0	0	0	0	0	0	0	0	0	0	0	0	0	0	0	0	0	0	0	0	0	0	0	0	1	2
6	0	0	0	0	0	0	0	0	0	0	0	0	0	0	0	0	0	0	0	0	0	0	0	0	0	0	0	0	0	0	0	0	0	0	0	0	0	0	0	0	0	0	0	0	0	0	0	0	0
SA-1-m	34	22	17	5	0	4	7	0	0	30	8	8	0	2	0	0	7	0	0	0	0	0	0	3	0	0	0	0	0	0	0	0	0	0	0	0	0	7	0	0	0	1	0	5	0	0	1	40	28
1	3	2	1	0	0	0	0	0	0	6	0	0	0	0	0	0	0	0	0	0	0	0	0	0	0	0	0	0	0	0	0	0	0	0	0	0	0	1	0	0	0	0	0	0	0	0	0	2	0
2	15	6	6	2	0	1	1	0	0	11	5	2	0	1	0	0	2	0	0	0	0	0	0	0	0	0	0	0	0	0	0	0	0	0	0	0	0	1	0	0	0	1	0	2	0	0	0	9	4
3	10	8	8	2	0	2	2	0	0	8	3	3	0	0	0	0	3	0	0	0	0	0	0	1	0	0	0	0	0	0	0	0	0	0	0	0	0	2	0	0	0	0	0	3	0	0	1	16	8
4	6	5	2	1	0	1	4	0	0	5	0	3	0	1	0	0	2	0	0	0	0	0	0	1	0	0	0	0	0	0	0	0	0	0	0	0	0	3	0	0	0	0	0	0	0	0	0	13	16
5	0	1	0	0	0	0	0	0	0	0	0	0	0	0	0	0	0	0	0	0	0	0	0	1	0	0	0	0	0	0	0	0	0	0	0	0	0	0	0	0	0	0	0	0	0	0	0	0	0
6	0	0	0	0	0	0	0	0	0	0	0	0	0	0	0	0	0	0	0	0	0	0	0	0	0	0	0	0	0	0	0	0	0	0	0	0	0	0	0	0	0	0	0	0	0	0	0	0	0
SA-1-f	30	4	4	0	0	0	3	0	0	75	2	0	0	4	0	2	4	0	0	0	0	0	0	4	0	0	0	0	0	5	0	0	0	0	0	0	0	36	0	0	0	0	0	20	0	0	0	12	7
1	2	0	0	0	0	0	0	0	0	15	1	0	0	0	0	0	0	0	0	0	0	0	0	0	0	0	0	0	0	1	0	0	0	0	0	0	0	0	0	0	0	0	0	2	0	0	0	0	1
2	10	2	2	0	0	0	0	0	0	32	0	0	0	2	0	0	1	0	0	0	0	0	0	1	0	0	0	0	0	2	0	0	0	0	0	0	0	7	0	0	0	0	0	7	0	0	0	4	3
3	15	1	1	0	0	0	2	0	0	22	1	0	0	1	0	2	3	0	0	0	0	0	0	2	0	0	0	0	0	2	0	0	0	0	0	0	0	13	0	0	0	0	0	9	0	0	0	7	2
4	3	0	0	0	0	0	1	0	0	6	0	0	0	1	0	0	0	0	0	0	0	0	0	1	0	0	0	0	0	0	0	0	0	0	0	0	0	14	0	0	0	0	0	2	0	0	0	1	1
5	0	1	1	0	0	0	0	0	0	0	0	0	0	0	0	0	0	0	0	0	0	0	0	0	0	0	0	0	0	0	0	0	0	0	0	0	0	2	0	0	0	0	0	0	0	0	0	0	0
6	0	0	0	0	0	0	0	0	0	0	0	0	0	0	0	0	0	0	0	0	0	0	0	0	0	0	0	0	0	0	0	0	0	0	0	0	0	0	0	0	0	0	0	0	0	0	0	0	0
SA-1-Vf	26	0	0	0	0	0	0	0	0	110	0	0	0	0	0	0	0	0	0	0	0	0	0	6	0	0	0	0	0	7	0	0	0	0	0	0	0	114	0	0	0	0	0	9	0	0	0	0	0
1	6	0	0	0	0	0	0	0	0	15	0	0	0	0	0	0	0	0	0	0	0	0	0	1	0	0	0	0	0	1	0	0	0	0	0	0	0	1	0	0	0	0	0	0	0	0	0	0	0
2	16	0	0	0	0	0	0	0	0	51	0	0	0	0	0	0	0	0	0	0	0	0	0	2	0	0	0	0	0	3	0	0	0	0	0	0	0	14	0	0	0	0	0	5	0	0	0	0	0
3	4	0	0	0	0	0	0	0	0	33	0	0	0	0	0	0	0	0	0	0	0	0	0	1	0	0	0	0	0	3	0	0	0	0	0	0	0	28	0	0	0	0	0	4	0	0	0	0	0
4	0	0	0	0	0	0	0	0	0	9	0	0	0	0	0	0	0	0	0	0	0	0	0	1	0	0	0	0	0	0	0	0	0	0	0	0	0	33	0	0	0	0	0	0	0	0	0	0	0
5	0	0	0	0	0	0	0	0	0	2	0	0	0	0	0	0	0	0	0	0	0	0	0	1	0	0	0	0	0	0	0	0	0	0	0	0	0	26	0	0	0	0	0	0	0	0	0	0	0
6	0	0	0	0	0	0	0	0	0	0	0	0	0	0	0	0	0	0	0	0	0	0	0	0	0	0	0	0	0	0	0	0	0	0	0	0	0	12	0	0	0	0	0	0	0	0	0	0	0
SA-2-m	42	15	18	3	14	0	4	0	0	36	10	5	0	0	0	0	4	0	0	0	0	0	0	5	0	3	0	0	0	0	0	0	0	0	0	0	0	5	0	0	0	0	0	0	0	1	0	31	36
1	2	0	2	0	1	0	0	0	0	5	0	0	0	0	0	0	0	0	0	0	0	0	0		0	0	0	0	0	0	0	0	0	0	0	0	0	0	0	0	0	0	0	0	0	0	0	2	2
2	18	5	7	2	3	0	1	0	0	14	2	1	0	0	0	0	3	0	0	0	0	0	0	1	0	0	0	0	0	0	0	0	0	0	0	0	0	0	0	0	0	0	0	0	0	0	0	4	11
3	17	6	6	1	6	0	3	0	0	13	3	3	0	0	0	0	1	0	0	0	0	0	0	2	0	2	0	0	0	0	0	0	0	0	0	0	0	2	0	0	0	0	0	0	0	0	0	15	13
4	4	4	3	0	4	0	0	0	0	4	3	1	0	0	0	0	0	0	0	0	0	0	0	2	0	1	0	0	0	0	0	0	0	0	0	0	0	3	0	0	0	0	0	0	0	1	0	9	10
5	1	0	0	0	0	0	0	0	0	0	2	0	0	0	0	0	0	0	0	0	0	0	0	0	0	0	0	0	0	0	0	0	0	0	0	0	0	0	0	0	0	0	0	0	0	0	0	1	0
6	0	0	0	0	0	0	0	0	0	0	0	0	0	0	0	0	0	0	0	0	0	0	0	0	0	0	0	0	0	0	0	0	0	0	0	0	0	0	0	0	0	0	0	0	0	0	0	0	0
SA-3-m	33	15	8	0	7	3	1	2	0	92	5	4	0	1	0	0	0	0	0	0	0	0	0	10	0	0	0	0	0	1	0	0	0	0	0	1	0	12	0	1	0	0	0	3	0	1	0	51	37
1	1	0	0	0	0	0	0	0	0	11	0	0	0	0	0	0	0	0	0	0	0	0	0	0	0	0	0	0	0	0	0	0	0	0	0	0	0	0	0	0	0	0	0	0	0	0	0	1	1
2	14	4	5	0	3	1	0	1	0	36	2	2	0	0	0	0	0	0	0	0	0	0	0	2	0	0	0	0	0	1	0	0	0	0	0	0	0	3	0	0	0	0	0	2	0	0	0	14	9
3	13	9	3	0	3	1	1	1	0	28	3	1	0	1	0	0	0	0	0	0	0	0	0	3	0	0	0	0	0	0	0	0	0	0	0	1	0	5	0	1	0	0	0	1	0	0	0	22	19
4	4	2	0	0	1	1	0	0	0	16	0	1	0	0	0	0	0	0	0	0	0	0	0	4	0	0	0	0	0	0	0	0	0	0	0	0	0	4	0	0	0	0	0	0	0	1	0	12	8
5	1	0	0	0	0	0	0	0	0	1	0	0	0	0	0	0	0	0	0	0	0	0	0	1	0	0	0	0	0	0	0	0	0	0	0	0	0	0	0	0	0	0	0	0	0	0	0	2	0
6	0	0	0	0	0	0	0	0	0	0	0	0	0	0	0	0	0	0	0	0	0	0	0	0	0	0	0	0	0	0	0	0	0	0	0	0	0	0	0	0	0	0	0	0	0	0	0	0	0
SA-4-m	30	21	12	0	0	0	6	0	0	26	0	0	0	0	0	0	0	0	0	0	0	0	0	7	7	0	0	0	4	0	0	0	0	0	0	0	0	7	4	0	0	0	0	0	0	0	0	69	33
1	3	1	0	0	0	0	0	0	0	3	0	0	0	0	0	0	0	0	0	0	0	0	0	0	1	0	0	0	0	0	0	0	0	0	0	0	0	0	0	0	0	0	0	0	0	0	0	12	4
2	15	6	5	0	0	0	3	0	0	13	0	0	0	0	0	0	0	0	0	0	0	0	0	2	2	0	0	0	1	0	0	0	0	0	0	0	0	1	1	0	0	0	0	0	0	0	0	21	9
3	9	11	6	0	0	0	3	0	0	8	0	0	0	0	0	0	0	0	0	0	0	0	0	2	1	0	0	0	2	0	0	0	0	0	0	0	0	2	2	0	0	0	0	0	0	0	0	30	16
4	3	3	1	0	0	0	0	0	0	2	0	0	0	0	0	0	0	0	0	0	0	0	0	3	3	0	0	0	1	0	0	0	0	0	0	0	0	3	1	0	0	0	0	0	0	0	0	6	4
5	0	0	0	0	0	0	0	0	0	0	0	0	0	0	0	0	0	0	0	0	0	0	0	0	0	0	0	0	0	0	0	0	0	0	0	0	0	1	0	0	0	0	0	0	0	0	0	0	0
6	0	0	0	0	0	0	0	0	0	0	0	0	0	0	0	0	0	0	0	0	0	0	0	0	0	0	0	0	0	0	0	0	0	0	0	0	0	0	0	0	0	0	0	0	0	0	0	0	0
SA-5-m	24	12	6	0	0	0	0	0	10	14	0	0	0	0	0	0	5	0	0	0	4	0	0	0	0	0	0	0	0	4	0	1	0	0	0	0	0	0	2	0	0	0	0	3	0	0	0	48	34
1	1	0	0	0	0	0	0	0	0	1	0	0	0	0	0	0	0	0	0	0	0	0	0	0	0	0	0	0	0	0	0	0	0	0	0	0	0	0	0	0	0	0	0	0	0	0	0	0	0
2	10	3	2	0	0	0	0	0	3	6	0	0	0	0	0	0	1	0	0	0	1	0	0	0	0	0	0	0	0	1	0	0	0	0	0	0	0	0	1	0	0	0	0	2	0	0	0	8	5
3	9	4	3	0	0	0	0	0	4	5	0	0	0	0	0	0	3	0	0	0	2	0	0	0	0	0	0	0	0	2	0	1	0	0	0	0	0	0	0	0	0	0	0	1	0	0	0	20	14
4	4	5	1	0	0	0	0	0	3	2	0	0	0	0	0	0	1	0	0	0	1	0	0	0	0	0	0	0	0	1	0	0	0	0	0	0	0	0	1	0	0	0	0	0	0	0	0	20	14
5	0	0	0	0	0	0	0	0	0	0	0	0	0	0	0	0	0	0	0	0	0	0	0	0	0	0	0	0	0	0	0	0	0	0	0	0	0	0	0	0	0	0	0	0	0	0	0	0	1
6	0	0	0	0	0	0	0	0	0	0	0	0	0	0	0	0	0	0	0	0	0	0	0	0	0	0	0	0	0	0	0	0	0	0	0	0	0	0	0	0	0	0	0	0	0	0	0	0	0
SA-6-m	25	22	23	0	0	0	3	0	0	10	20	15	0	0	0	0	3	1	0	0	1	0	0	0	2	0	0	0	0	0	0	0	0	0	0	0	1	0	0	0	0	0	0	0	0	0	0	52	55
1	0	0	0	0	0	0	0	0	0	0	0	0	0	0	0	0	0	0	0	0	0	0	0	0	0	0	0	0	0	0	0	0	0	0	0	0	0	0	0	0	0	0	0	0	0	0	0	0	1
2	9	3	5	0	0	0	0	0	0	4	11	2	0	0	0	0	0	0	0	0	0	0	0	0	0	0	0	0	0	0	0	0	0	0	0	0	1	0	0	0	0	0	0	0	0	0	0	6	11
3	11	13	12	0	0	0	1	0	0	5	7	8	0	0	0	0	3	1	0	0	0	0	0	0	2	0	0	0	0	0	0	0	0	0	0	0	0	0	0	0	0	0	0	0	0	0	0	23	20
4	5	6	6	0	0	0	2	0	0	1	2	5	0	0	0	0	0	0	0	0	1	0	0	0	0	0	0	0	0	0	0	0	0	0	0	0	0	0	0	0	0	0	0	0	0	0	0	19	20
5	0	0	0	0	0	0	0	0	0	0	0	0	0	0	0	0	0	0	0	0	0	0	0	0	0	0	0	0	0	0	0	0	0	0	0	0	0	0	0	0	0	0	0	0	0	0	0	4	3
6	0	0	0	0	0	0	0	0	0	0	0	0	0	0	0	0	0	0	0	0	0	0	0	0	0	0	0	0	0	0	0	0	0	0	0	0	0	0	0	0	0	0	0	0	0	0	0	0	0
SA-7-m	30	46	43	0	0	3	0	0	0	11	4	4	0	0	0	0	0	0	0	0	0	0	0	0	0	0	0	0	0	0	0	0	0	0	0	0	0	0	0	0	0	0	0	0	0	0	0	80	74
1	0	7	6	0	0	0	0	0	0	1	1	1	0	0	0	0	0	0	0	0	0	0	0	0	0	0	0	0	0	0	0	0	0	0	0	0	0	0	0	0	0	0	0	0	0	0	0	8	7
2	8	19	18	0	0	0	0	0	0	4	1	1	0	0	0	0	0	0	0	0	0	0	0	0	0	0	0	0	0	0	0	0	0	0	0	0	0	0	0	0	0	0	0	0	0	0	0	38	34
3	16	18	15	0	0	3	0	0	0	5	2	2	0	0	0	0	0	0	0	0	0	0	0	0	0	0	0	0	0	0	0	0	0	0	0	0	0	0	0	0	0	0	0	0	0	0	0	25	27
4	6	2	4	0	0	0	0	0	0	1	0	0	0	0	0	0	0	0	0	0	0	0	0	0	0	0	0	0	0	0	0	0	0	0	0	0	0	0	0	0	0	0	0	0	0	0	0	7	5
5	0	0	0	0	0	0	0	0	0	0	0	0	0	0	0	0	0	0	0	0	0	0	0	0	0	0	0	0	0	0	0	0	0	0	0	0	0	0	0	0	0	0	0	0	0	0	0	2	1
6	0	0	0	0	0	0	0	0	0	0	0	0	0	0	0	0	0	0	0	0	0	0	0	0	0	0	0	0	0	0	0	0	0	0	0	0	0	0	0	0	0	0	0	0	0	0	0	0	0
SA-8-m	33	19	13	0	0	0	0	0	0	52	17	8	0	0	0	0	18	0	0	0	0	0	0	5	0	0	0	0	0	0	0	0	0	0	0	0	3	7	0	0	0	0	0	3	0	0	0	64	52
1	4	1	1	0	0	0	0	0	0	7	1	0	0	0	0	0	0	0	0	0	0	0	0	0	0	0	0	0	0	0	0	0	0	0	0	0	0	0	0	0	0	0	0	0	0	0	0	0	1
2	12	9	7	0	0	0	0	0	0	21	6	3	0	0	0	0	4	0	0	0	0	0	0	1	0	0	0	0	0	0	0	0	0	0	0	0	0	1	0	0	0	0	0	2	0	0	0	17	15
3	13	6	5	0	0	0	0	0	0	15	8	4	0	0	0	0	10	0	0	0	0	0	0	1	0	0	0	0	0	0	0	0	0	0	0	0	2	3	0	0	0	0	0	1	0	0	0	26	20
4	4	3	0	0	0	0	0	0	0	9	2	1	0	0	0	0	4	0	0	0	0	0	0	3	0	0	0	0	0	0	0	0	0	0	0	0	1	3	0	0	0	0	0	0	0	0	0	19	14
5	0	0	0	0	0	0	0	0	0	0	0	0	0	0	0	0	0	0	0	0	0	0	0	0	0	0	0	0	0	0	0	0	0	0	0	0	0	0	0	0	0	0	0	0	0	0	0	2	2
6	0	0	0	0	0	0	0	0	0	0	0	0	0	0	0	0	0	0	0	0	0	0	0	0	0	0	0	0	0	0	0	0	0	0	0	0	0	0	0	0	0	0	0	0	0	0	0	0	0
SA-9-m	36	17	10	0	0	0	0	0	0	48	7	7	0	0	0	0	13	0	0	0	0	0	0	3	0	0	0	0	0	0	0	0	0	0	0	0	0	0	0	0	0	0	0	0	0	0	0	58	51
1	2	1	0	0	0	0	0	0	0	3	0	0	0	0	0	0	0	0	0	0	0	0	0	0	0	0	0	0	0	0	0	0	0	0	0	0	0	0	0	0	0	0	0	0	0	0	0	1	7
2	7	6	2	0	0	0	0	0	0	12	2	3	0	0	0	0	2	0	0	0	0	0	0	1	0	0	0	0	0	0	0	0	0	0	0	0	0	0	0	0	0	0	0	0	0	0	0	18	24
3	16	9	7	0	0	0	0	0	0	23	2	2	0	0	0	0	7	0	0	0	0	0	0	1	0	0	0	0	0	0	0	0	0	0	0	0	0	0	0	0	0	0	0	0	0	0	0	21	14
4	7	1	1	0	0	0	0	0	0	8	3	2	0	0	0	0	4	0	0	0	0	0	0	1	0	0	0	0	0	0	0	0	0	0	0	0	0	0	0	0	0	0	0	0	0	0	0	15	6
5	4	0	0	0	0	0	0	0	0	2	0	0	0	0	0	0	0	0	0	0	0	0	0	0	0	0	0	0	0	0	0	0	0	0	0	0	0	0	0	0	0	0	0	0	0	0	0	3	0
6	0	0	0	0	0	0	0	0	0	0	0	0	0	0	0	0	0	0	0	0	0	0	0	0	0	0	0	0	0	0	0	0	0	0	0	0	0	0	0	0	0	0	0	0	0	0	0	0	0
SA-10-m	37	11	8	0	0	0	0	0	0	39	7	6	0	0	0	0	8	0	0	0	0	0	0	0	0	0	0	0	0	2	0	0	0	0	0	0	0	8	10	0	0	0	0	0	0	0	0	54	42
1	1	0	0	0	0	0	0	0	0	3	0	0	0	0	0	0	0	0	0	0	0	0	0	0	0	0	0	0	0	0	0	0	0	0	0	0	0	0	1	0	0	0	0	0	0	0	0	2	1
2	12	3	3	0	0	0	0	0	0	10	2	3	0	0	0	0	3	0	0	0	0	0	0	0	0	0	0	0	0	0	0	0	0	0	0	0	0	1	5	0	0	0	0	0	0	0	0	9	12
3	20	6	4	0	0	0	0	0	0	20	5	3	0	0	0	0	3	0	0	0	0	0	0	0	0	0	0	0	0	2	0	0	0	0	0	0	0	2	3	0	0	0	0	0	0	0	0	32	23
4	4	2	1	0	0	0	0	0	0	6	0	0	0	0	0	0	2	0	0	0	0	0	0	0	0	0	0	0	0	0	0	0	0	0	0	0	0	4	1	0	0	0	0	0	0	0	0	9	6
5	0	0	0	0	0	0	0	0	0	0	0	0	0	0	0	0	0	0	0	0	0	0	0	0	0	0	0	0	0	0	0	0	0	0	0	0	0	1	0	0	0	0	0	0	0	0	0	2	0
6	0	0	0	0	0	0	0	0	0	0	0	0	0	0	0	0	0	0	0	0	0	0	0	0	0	0	0	0	0	0	0	0	0	0	0	0	0	0	0	0	0	0	0	0	0	0	0	0	0
SA-11-m	36	16	9	0	0	0	0	5	0	43	0	1	0	0	0	0	8	5	0	0	0	0	0	0	0	0	0	0	3	3	0	0	0	0	0	0	2	7	1	0	0	0	0	0	0	0	0	62	45
1	0	1	0	0	0	0	0	0	0	4	0	0	0	0	0	0	0	0	0	0	0	0	0	0	0	0	0	0	0	0	0	0	0	0	0	0	0	0	0	0	0	0	0	0	0	0	0	0	0
2	9	3	0	0	0	0	0	0	0	17	0	0	0	0	0	0	2	1	0	0	0	0	0	0	0	0	0	0	1	2	0	0	0	0	0	0	1	1	0	0	0	0	0	0	0	0	0	11	12
3	22	8	6	0	0	0	0	3	0	14	0	1	0	0	0	0	5	2	0	0	0	0	0	0	0	0	0	0	1	1	0	0	0	0	0	0	1	3	1	0	0	0	0	0	0	0	0	36	25
4	5	3	3	0	0	0	0	2	0	8	0	0	0	0	0	0	1	2	0	0	0	0	0	0	0	0	0	0	1	0	0	0	0	0	0	0	0	2	0	0	0	0	0	0	0	0	0	12	6
5	0	1	0	0	0	0	0	0	0	0	0	0	0	0	0	0	0	0	0	0	0	0	0	0	0	0	0	0	0	0	0	0	0	0	0	0	0	1	0	0	0	0	0	0	0	0	0	2	2
6	0	0	0	0	0	0	0	0	0	0	0	0	0	0	0	0	0	0	0	0	0	0	0	0	0	0	0	0	0	0	0	0	0	0	0	0	0	0	0	0	0	0	0	0	0	0	0	1	0
SA-12-m	44	10	8	13	0	0	0	3	0	62	4	6	0	0	0	0	8	0	0	0	0	0	4	4	0	0	0	0	0	3	0	0	0	0	0	0	2	4	0	0	0	0	0	0	0	0	4	49	40
1	2	1	1	2	0	0	0	0	0	6	0	0	0	0	0	0	0	0	0	0	0	0	0	0	0	0	0	0	0	0	0	0	0	0	0	0	0	0	0	0	0	0	0	0	0	0	0	3	2
2	11	3	2	5	0	0	0	0	0	16	1	2	0	0	0	0	1	0	0	0	0	0	0	0	0	0	0	0	0	1	0	0	0	0	0	0	0	1	0	0	0	0	0	0	0	0	0	13	6
3	22	4	4	5	0	0	0	3	0	21	2	4	0	0	0	0	2	0	0	0	0	0	3	1	0	0	0	0	0	2	0	0	0	0	0	0	1	1	0	0	0	0	0	0	0	0	3	24	23
4	8	2	1	1	0	0	0	0	0	17	1	0	0	0	0	0	4	0	0	0	0	0	1	2	0	0	0	0	0	0	0	0	0	0	0	0	1	2	0	0	0	0	0	0	0	0	1	6	8
5	1	0	0	0	0	0	0	0	0	2	0	0	0	0	0	0	1	0	0	0	0	0	0	1	0	0	0	0	0	0	0	0	0	0	0	0	0	0	0	0	0	0	0	0	0	0	0	2	1
6		0	0	0	0	0	0	0	0	0	0	0	0	0	0	0	0	0	0	0	0	0	0	0	0	0	0	0	0	0	0	0	0	0	0	0	0	0	0	0	0	0	0	0	0	0	0	1	0
SA-13-m	36	17	9	0	0	0	0	0	0	40	24	0	0	0	0	0	7	0	0	0	0	0	0	5	0	0	0	0	0	0	0	0	0	0	0	0	0	12	0	0	0	0	0	3	0	0	0	68	48
1	1	1	0	0	0	0	0	0	0	7	2	0	0	0	0	0	0	0	0	0	0	0	0	0	0	0	0	0	0	0	0	0	0	0	0	0	0	0	0	0	0	0	0	0	0	0	0	4	3
2	5	3	1	0	0	0	0	0	0	10	6	0	0	0	0	0	1	0	0	0	0	0	0	1	0	0	0	0	0	0	0	0	0	0	0	0	0	1	0	0	0	0	0	1	0	0	0	20	8
3	16	10	5	0	0	0	0	0	0	10	12	0	0	0	0	0	4	0	0	0	0	0	0	3	0	0	0	0	0	0	0	0	0	0	0	0	0	6	0	0	0	0	0	2	0	0	0	30	26
4	13	3	2	0	0	0	0	0	0	11	4	0	0	0	0	0	2	0	0	0	0	0	0	1	0	0	0	0	0	0	0	0	0	0	0	0	0	5	0	0	0	0	0	0	0	0	0	10	8
5	1	0	1	0	0	0	0	0	0	2	0	0	0	0	0	0	0	0	0	0	0	0	0	0	0	0	0	0	0	0	0	0	0	0	0	0	0	0	0	0	0	0	0	0	0	0	0	3	3
6	0	0	0	0	0	0	0	0	0	0	0	0	0	0	0	0	0	0	0	0	0	0	0	0	0	0	0	0	0	0	0	0	0	0	0	0	0	0	0	0	0	0	0	0	0	0	0	1	0
SA-14-m	37	19	20	0	0	0	4	0	0	35	7	0	0	0	0	0	16	0	0	0	0	0	0	3	0	1	0	0	0	0	0	0	0	0	0	0	0	0	0	0	0	0	0	0	0	0	0	67	64
1	1	0	0	0	0	0	0	0	0	3	0	0	0	0	0	0	0	0	0	0	0	0	0	0	0	0	0	0	0	0	0	0	0	0	0	0	0	0	0	0	0	0	0	0	0	0	0		0
2	7	6	4	0	0	0	1	0	0	10	2	0	0	0	0	0	3	0	0	0	0	0	0	2	0	0	0	0	0	0	0	0	0	0	0	0	0	0	0	0	0	0	0	0	0	0	0	8	10
3	19	10	10	0	0	0	2	0	0	12	4	0	0	0	0	0	8	0	0	0	0	0	0	1	0	0	0	0	0	0	0	0	0	0	0	0	0	0	0	0	0	0	0	0	0	0	0	36	33
4	9	3	6	0	0	0	1	0	0	10	1	0	0	0	0	0	5	0	0	0	0	0	0	0	0	0	0	0	0	0	0	0	0	0	0	0	0	0	0	0	0	0	0	0	0	0	0	22	19
5	1	0	0	0	0	0	0	0	0	0	0	0	0	0	0	0	0	0	0	0	0	0	0	0	0	0	0	0	0	0	0	0	0	0	0	0	0	0	0	0	0	0	0	0	0	0	0	1	2
6		0	0	0	0	0	0	0	0	0	0	0	0	0	0	0	0	0	0	0	0	0	0	0	0	1	0	0	0	0	0	0	0	0	0	0	0	0	0	0	0	0	0	0	0	0	0		0
SA-15-m	46	12	12	0	0	11	0	0	0	7	0	0	0	0	0	0	0	0	0	0	0	0	0	0	0	0	0	0	0	0	0	0	0	0	0	0	3	0	0	0	0	0	0	0	0	0	0	40	62
1	2	0	1	0	0	0	0	0	0	0	0	0	0	0	0	0	0	0	0	0	0	0	0	0	0	0	0	0	0	0	0	0	0	0	0	0	0	0	0	0	0	0	0	0	0	0	0		1
2	15	4	4	0	0	3	0	0	0	4	0	0	0	0	0	0	0	0	0	0	0	0	0	0	0	0	0	0	0	0	0	0	0	0	0	0	0	0	0	0	0	0	0	0	0	0	0	8	15
3	21	7	6	0	0	6	0	0	0	3	0	0	0	0	0	0	0	0	0	0	0	0	0	0	0	0	0	0	0	0	0	0	0	0	0	0	1	0	0	0	0	0	0	0	0	0	0	23	32
4	7	1	1	0	0	2	0	0	0	0	0	0	0	0	0	0	0	0	0	0	0	0	0	0	0	0	0	0	0	0	0	0	0	0	0	0	1	0	0	0	0	0	0	0	0	0	0	8	13
5	1	0	0	0	0	0	0	0	0	0	0	0	0	0	0	0	0	0	0	0	0	0	0	0	0	0	0	0	0	0	0	0	0	0	0	0	1	0	0	0	0	0	0	0	0	0	0	1	1
6	0	0	0	0	0	0	0	0	0	0	0	0	0	0	0	0	0	0	0	0	0	0	0	0	0	0	0	0	0	0	0	0	0	0	0	0	0	0	0	0	0	0	0	0	0	0	0	0	0
	*Key to Grain Shape Categories. 1 = very angular; 2 = angular; 3 = sub-angular; 4 = subrounded; 5 = rounded; 6 = well rounded; Vc: very coarse sand fraction; C: coarse sand fraction; m: medium sand fraction; f: fine sand fraction; Vf: very fine sand fraction.
[truncated: 23 more columns]

## Sheet: LIPARI
For Lipari raw data (comprising roundness data) see Morrone et al., 2017 and Morrone et al., 2018.

## Sheet: VULCANO
Regarding Vulcano Island, the calculation of mean roundness was focused directly on selected grain-type categories (the most abundant) useful to calculate it, a targeted point-counting was carried out, but still reaching the 400 point as the total.
Data are shown separately (see below), the modal analysis (upper table) and grains counted for the mean roundness calculation (lower table).
Samples	Qm	Qp	P	K	Py	Ol	D(Op)	Lvvbrgl	Lvvblgl	Lvvclgl	Lvvorgl	Lvvgrgl	Lvmibrgl	Lvmiblgl	Lvmiclgl	Lvmiorgl	Lvmigrgl	Lvlbrgl	Lvlblgl	Lvlorgl	Lvlgrgl	Lvlclgl	Lvalt	Lvf	Lvo	Lsc	Bio	Lm	Bt	TOT
V1-m	1	0	34	0	155	8	1	1	10	0	0	0	7	24	0	6	2	31	88	24	6	0	0	0	1	1	0	0	0	400
V1-f	0	0	66	0	181	15	19	4	8	0	1	0	14	23	0	0	3	21	22	10	2	0	10	1	0	0	0	0	0	400
V2-m	0	0	33	0	92	7	3	0	4	0	2	0	6	25	0	3	10	20	145	16	19	1	4	0	10	0	0	0	0	400
V2-f	0	0	79	0	118	31	16	1	22	0	2	0	11	43	0	4	4	7	42	9	4	0	4	0	3	0	0	0	0	400
V4-m	0	0	45	2	88	3	6	0	2	0	0	0	27	29	21	3	0	44	30	15	0	37	20	17	3	8	0	0	0	400
V4-f	0	0	50	8	113	9	6	4	12	1	5	0	27	30	33	8	0	13	26	8	0	15	14	4	0	14	0	0	0	400
V5-m	0	0	38	2	23	5	0	3	10	0	1	0	18	59	8	13	4	37	114	13	5	27	7	3	6	4	0	0	0	400
V5-f	0	0	45	3	36	23	0	1	9	1	0	0	25	83	14	8	8	28	73	9	2	18	5	0	4	5	0	0	0	400
V6-m	0	0	47	1	15	3	0	9	10	0	3	0	20	48	10	18	8	42	106	17	9	19	4	7	0	4	0	0	0	400
V6-f	0	0	36	3	40	1	0	1	12	0	0	0	34	88	30	14	5	15	91	5	1	19	0	2	2	1	0	0	0	400
V7-m	4	4	36	7	99	4	0	7	8	0	1	0	9	32	12	4	2	33	78	4	3	28	9	5	2	9	0	0	0	400
V7-f	2	2	44	0	102	15	6	2	7	0	2	0	16	70	12	15	4	22	49	15	0	8	3	0	0	3	0	1	0	400
V8-m	0	0	24	4	50	1	0	2	1	7	0	0	16	47	12	14	5	42	99	8	4	25	8	2	5	24	0	0	0	400
V8-f	0	0	54	11	56	17	0	1	5	0	2	0	20	81	7	20	3	18	57	3	6	12	12	0	1	14	0	0	0	400
V9-m	0	0	28	3	142	16	6	1	2	0	1	0	8	34	1	1	1	15	134	5	0	2	0	0	0	0	0	0	0	400
V9-f	0	0	34	10	98	13	12	2	15	0	0	0	11	111	3	4	1	12	70	1	0	3	0	0	0	0	0	0	0	400
V10-m	0	0	45	2	72	9	0	0	1	0	0	0	8	32	1	1	2	25	166	2	17	14	0	0	0	3	0	0	0	400
V10-f	0	0	42	2	98	9	1	0	2	0	1	0	12	107	6	5	3	19	81	2	2	6	0	0	1	1	0	0	0	400
V11-m	0	0	50	3	86	21	1	2	14	0	0	0	13	70	3	4	5	40	70	10	3	5	0	0	0	0	0	0	0	400
V11-f	0	0	51	2	87	12	0	0	0	0	0	0	7	114	14	10	2	12	75	2	1	10	0	0	0	1	0	0	0	400
V12-m	0	0	40	2	191	13	24	0	7	0	0	0	3	23	3	3	4	7	57	12	2	9	0	0	0	0	0	0	0	400
V12-f	0	0	15	1	214	43	34	0	1	0	0	0	3	23	2	3	2	6	37	9	2	4	1	0	0	0	0	0	0	400
SAMPLE	P	Py	K	Ol	D(Op)	Lvl	Lvmi	Lvv	Lvf	TOT		*Key to Grain Shape Categories. 1 = very angular; 2 = angular; 3 = sub-angular; 4 = subrounded; 5 = rounded; 6 = well rounded; Vc: very coarse sand fraction;
V1-m	40	158	0	8	0	144	39	11	0	400		C: coarse sand fraction; m: medium sand fraction; f: fine sand fraction; Vf: very fine sand fraction.
1	2	17	0	0	0	17	0	4	0	40
2	16	77	0	0	0	28	5	7	0	133
3	17	60	0	3	0	68	14	0	0	162
4	4	4	0	4	0	26	15	0	0	53
5	1	0	0	1	0	5	3	0	0	10
6	0	0	0	0	0	0	2	0	0	2
V2-m	32	98	0	7	4	194	52	13	0	400
1	1	9	0	0	0	21	0	5	0	36
2	12	57	0	0	0	40	4	8	0	121
3	18	27	0	3	1	90	22	0	0	161
4	1	5	0	4	3	36	20	0	0	69
5	0	0	0	0	0	5	3	0	0	8
6	0	0	0	0	0	2	3	0	0	5
V4-m	43	77	5	6	9	137	99	6	18	400
1	2	11	0	0	0	4	0	2	0	19
2	12	22	2	0	0	23	11	4	3	77
3	21	33	3	1	2	59	47	0	6	172
4	7	9	0	3	3	37	41	0	7	107
5	1	2	0	2	4	8	0	0	2	19
6	0	0	0	0	0	6	0	0	0	6
V5-m	41	52	4	7	2	161	104	29	0	400
1	6	11	0	0	0	26	2	15	0	60
2	22	32	0	0	0	69	21	12	0	156
3	12	9	3	3	0	46	29	2	0	104
4	1	0	1	3	2	16	35	0	0	58
5	0	0	0	1	0	3	11	0	0	15
6	0	0	0	0	0	1	6	0	0	7
V6-m	47	44	3	3	2	184	88	23	6	400
1	8	12	0	0	0	29	3	12	0	64
2	27	17	2	1	0	78	21	11	3	160
3	10	15	1	1	1	51	28	0	2	109
4	2	0	0	1	1	15	20	0	1	40
5	0	0	0	0	0	7	9	0	0	16
6	0	0	0	0	0	4	7	0	0	11
V7-m	39	92	6	7	0	133	97	22	4	400
1	1	17	1	0	0	8	0	9	0	36
2	8	29	2	1	0	28	2	8	1	79
3	15	44	2	2	0	55	34	5	2	159
4	13	2	1	2	0	29	41	0	1	89
5	2	0	0	1	0	12	12	0	0	27
6	0	0	0	1	0	1	8	0	0	10
V8-m	44	55	3	4	3	165	101	20	5	400
1	1	7	0	0	0	7	0	9	0	24
2	12	24	1		0	38	9	11	1	96
3	14	19	1	1	1	64	28	0	2	130
4	15	5	1	2	1	40	31	0	1	96
5	2	0		1	1	14	22	0	1	41
6	0	0	0	0	0	2	11	0	0	13
V9-m	40	145	9	18	13	92	60	23	0	400
1	0	28	0	0	0	0	0	7	0	35
2	4	58	4	0	1	19	0	9	0	95
3	15	48	3	3	2	25	15	5	0	116
4	17	9	2	7	5	32	28	2	0	102
5	4	2	0	6	4	11	17	0	0	44
6	0	0	0	2	1	5	0	0	0	8
V10-m	55	80	13	12	3	162	58	17	0	400
1	5	16	1	0	0	9	0	8	0	39
2	12	24	4	1	0	29	2	9	0	81
3	15	21	5	3	0	50	12	0	0	106
4	19	19	2	3	2	47	19	0	0	111
5	4	0	1	3	1	20	14	0		43
6	0	0	0	2	0	7	11	0	0	20
V11-m	51	83	6	15	5	125	98	15	2	400
1	9	25	1			17	2	6	0	60
2	19	32	2	0	0	29	11	8	0	101
3	15	24	2	4	1	35	29	1	1	112
4	8	2	1	5	2	31	35	0	1	85
5	0	0	0	4	2	11	16	0	0	33
6	0	0	0	2	0	2	5	0	0	9
V12-m	50	200	7	14	20	55	47	7	0	400
1	7	28	0	0	0	2	0	4	0	41
2	17	84	4	0	3	15	2	3	0	128
3	19	74	2	4	5	19	14	0	0	137
4	7	14	1	5	6	14	17	0	0	64
5	0	0	0	3	4	5	9	0	0	21
6	0	0	0	2	2	0	5	0	0	9

## Sheet: PANAREA
SAMPLE	P	P inLvlblgl	P inLvlbrgl	P inLvlgrgl	P inLvlclgl	P alt	Py	Py in Lvlblgl	Py in Lvlbrgl	Py in Lvlorgl	Py in Lvlgrgl	Py in Lvlclgl	Py alt	K	K in Lvlblgl	K in Lvlbrgl	K in Lvlgrgl	K in Lvlclgl	Ol	Hb	Hbalt	Hb in Lvlblgl	Hb in Lvlbrgl	Hb in Lvlgrgl	Hb in Lvlclgl	D(Op)	D(Op) in Lvlbrgl	Bt	Bt in Lvlbrgl	Bt in Lvlclgl	Cal	Qm	Qp	Ch	Lvlblgl	Lvlbrgl	Lvlgrgl	Lvlclgl	Lvmiblgl	Lvmibrgl	Lvmigrgl	Lvmiclgl	Lvvblgl	Lvvbrgl	Lvvorgl	Lvvgrgl	Lvvclgl	Lvalt	Lvf
PN-1-Vc	24	40	0	0	0	0	11	0	0	0	0	0	0	0	0	0	0	0	0	7	0	1	19	0	0	0	0	0	12	0	0	0	0	0	15	123	4	0	0	17	0	0	2	2	0	0	1	15	6
1	16	22	0	0	0	0	4	0	0	0	0	0	0	0	0	0	0	0	0	3	0	1	1	0	0	0	0	0	12	0	0	0	0	0	10	43	0	0	0	0	0	0	0	0	0	0	1	0	0
2	8	18	0	0	0	0	7	0	0	0	0	0	0	0	0	0	0	0	0	4	0	0	18	0	0	0	0	0	0	0	0	0	0	0	5	65	4	0	0	12	0	0	2	2	0	0	0	15	6
3	0	0	0	0	0	0	0	0	0	0	0	0	0	0	0	0	0	0	0	0	0	0	0	0	0	0	0	0	0	0	0	0	0	0	0	15	0	0	0	5	0	0	0	0	0	0	0	0	0
4	0	0	0	0	0	0	0	0	0	0	0	0	0	0	0	0	0	0	0	0	0	0	0	0	0	0	0	0	0	0	0	0	0	0	0	0	0	0	0	0	0	0	0	0	0	0	0	0	0
5	0	0	0	0	0	0	0	0	0	0	0	0	0	0	0	0	0	0	0	0	0	0	0	0	0	0	0	0	0	0	0	0	0	0	0	0	0	0	0	0	0	0	0	0	0	0	0	0	0
6	0	0	0	0	0	0	0	0	0	0	0	0	0	0	0	0	0	0	0	0	0	0	0	0	0	0	0	0	0	0	0	0	0	0	0	0	0	0	0	0	0	0	0	0	0	0	0	0	0
PN-1-C	62	3	29	0	0	2	18	1	2	0	0	0	0	0	0	0	0	0	0	11	0	0	5	0	0	3	3	18	5	5	0	0	0	0	9	117	2	14	0	42	0	1	2	5	0	0	2	21	15
1	36	2	7	0	0	0	12	0	1	0	0	0	0	0	0	0	0	0	0	11	0	0	0	0	0	0	3	16	0	0	0	0	0	0	3	47	0	6	0	9	0	1	1	2	0	0	2	0	0
2	26	0	22	0	0	2	5	1	0	0	0	0	0	0	0	0	0	0	0	0	0	0	5	0	0	0	0	0	5	5	0	0	0	0	6	59	2	8	0	25	0	0	1	2	0	0	0	21	12
3	0	1	0	0	0	0	1	0	1	0	0	0	0	0	0	0	0	0	0	0	0	0	0	0	0	0	0	2	0	0	0	0	0	0	0	11	0	0	0	8	0	0	0	1	0	0	0	0	3
4	0	0	0	0	0	0	0	0	0	0	0	0	0	0	0	0	0	0	0	0	0	0	0	0	0	3	0	0	0	0	0	0	0	0	0	0	0	0	0	0	0	0	0	0	0	0	0	0	0
5	0	0	0	0	0	0	0	0	0	0	0	0	0	0	0	0	0	0	0	0	0	0	0	0	0	0	0	0	0	0	0	0	0	0	0	0	0	0	0	0	0	0	0	0	0	0	0	0	0
6	0	0	0	0	0	0	0	0	0	0	0	0	0	0	0	0	0	0	0	0	0	0	0	0	0	0	0	0	0	0	0	0	0	0	0	0	0	0	0	0	0	0	0	0	0	0	0	0	0
PN-1-m	81	2	5	0	2	0	29	0	2	0	0	0	0	2	0	0	0	0	1	18	0	2	0	0	0	28	0	18	0	0	0	0	0	2	12	15	0	13	27	4	0	17	40	16	0	0	8	35	18
1	54	0	0	0	0	0	8	0	0	0	0	0	0	0	0	0	0	0	0	12	0	0	0	0	0	0	0	10	0	0	0	0	0	0	1	1	0	9	10	4	0	3	17	4	0	0	5	0	5
2	25	2	5	0	2	0	18	0	2	0	0	0	0	2	0	0	0	0	1	6	0	2	0	0	0	10	0	8	0	0	0	0	0	2	7	10	0	4	12	0	0	14	14	8	0	0	3	31	13
3	2	0	0	0	0	0	3	0	0	0	0	0	0	0	0	0	0	0	0	0	0	0	0	0	0	14	0	0	0	0	0	0	0	0	4	4	0	0	5	0	0	0	8	4	0	0	0	4	0
4	0	0	0	0	0	0	0	0	0	0	0	0	0	0	0	0	0	0	0	0	0	0	0	0	0	4	0	0	0	0	0	0	0	0	0	0	0	0	0	0	0	0	1	0	0	0	0	0	0
5	0	0	0	0	0	0	0	0	0	0	0	0	0	0	0	0	0	0	0	0	0	0	0	0	0	0	0	0	0	0	0	0	0	0	0	0	0	0	0	0	0	0	0	0	0	0	0	0	0
6	0	0	0	0	0	0	0	0	0	0	0	0	0	0	0	0	0	0	0	0	0	0	0	0	0	0	0	0	0	0	0	0	0	0	0	0	0	0	0	0	0	0	0	0	0	0	0	0	0
PN-1-f	40	2	4	0	6	0	56	0	0	0	0	0	1	6	0	0	0	0	0	35	0	0	2	0	1	39	0	37	1	0	0	0	0	0	3	4	0	7	19	14	0	11	53	0	0	0	0	44	15
1	27	1	1	0	0	0	23	0	0	0	0	0	0	0	0	0	0	0	0	25	0	0	0	0	1	0	0	27	0	0	0	0	0	0	1	1	0	6	9	2	0	0	32	0	0	0	0	9	5
2	11	1	3	0	6	0	21	0	0	0	0	0	0	6	0	0	0	0	0	10	0	0	2	0	0	15	0	9	1	0	0	0	0	0	2	2	0	1	8	7	0	11	10	0	0	0	0	25	10
3	2	0	0	0	0	0	6	0	0	0	0	0	1	0	0	0	0	0	0	0	0	0	0	0	0	20	0	1	0	0	0	0	0	0	0	1	0	0	2	5	0	0	3	0	0	0	0	4	0
4	0	0	0	0	0	0	6	0	0	0	0	0	0	0	0	0	0	0	0	0	0	0	0	0	0	4	0	0	0	0	0	0	0	0	0	0	0	0	0	0	0	0	8	0	0	0	0	4	0
5	0	0	0	0	0	0	0	0	0	0	0	0	0	0	0	0	0	0	0	0	0	0	0	0	0	0	0	0	0	0	0	0	0	0	0	0	0	0	0	0	0	0	0	0	0	0	0	2	0
6	0	0	0	0	0	0	0	0	0	0	0	0	0	0	0	0	0	0	0	0	0	0	0	0	0	0	0	0	0	0	0	0	0	0	0	0	0	0	0	0	0	0	0	0	0	0	0	0	0
PN-1-Vf	41	0	0	0	0	0	34	0	0	0	0	0	0	11	0	0	0	0	0	28	0	0	0	0	0	53	0	34	0	0	0	0	0	0	5	4	0	0	5	6	0	27	45	10	0	0	34	41	11
1	28	0	0	0	0	0	18	0	0	0	0	0	0	4	0	0	0	0	0	19	0	0	0	0	0	1	0	24	0	0	0	0	0	0	1	1	0	0	0	2	0	2	21	3	0	0	12	6	2
2	10	0	0	0	0	0	11	0	0	0	0	0	0	7	0	0	0	0	0	9	0	0	0	0	0	7	0	10	0	0	0	0	0	0	3	2	0	0	4	4	0	24	15	6	0	0	22	18	9
3	3	0	0	0	0	0	5	0	0	0	0	0	0	0	0	0	0	0	0	0	0	0	0	0	0	14	0	0	0	0	0	0	0	0	1	1	0	0	1	0	0	1	8	1	0	0	0	17	0
4	0	0	0	0	0	0	0	0	0	0	0	0	0	0	0	0	0	0	0	0	0	0	0	0	0	17	0	0	0	0	0	0	0	0	0	0	0	0	0	0	0	0	1	0	0	0	0	0	0
5	0	0	0	0	0	0	0	0	0	0	0	0	0	0	0	0	0	0	0	0	0	0	0	0	0	14	0	0	0	0	0	0	0	0	0	0	0	0	0	0	0	0	0	0	0	0	0	0	0
6	0	0	0	0	0	0	0	0	0	0	0	0	0	0	0	0	0	0	0	0	0	0	0	0	0	0	0	0	0	0	0	0	0	0	0	0	0	0	0	0	0	0	0	0	0	0	0	0	0
PN-2-m	25	0	0	5	0	0	5	0	0	0	0	0	0	7	0	0	0	0	0	7	0	0	0	0	0	0	0	0	0	0	0	11	2	0	13	29	89	40	7	29	90	36	0	0	0	0	2	1	0
1	10	0	0	0	0	0	2	0	0	0	0	0	0	2	0	0	0	0	0	3	0	0	0	0	0	0	0	0	0	0	0	0	0	0	2	7	34	21	1	3	21	18	0	0	0	0	1	0	0
2	12	0	0	5	0	0	3	0	0	0	0	0	0	5	0	0	0	0	0	4	0	0	0	0	0	0	0	0	0	0	0	9	0	0	7	18	35	19	5	18	39	17	0	0	0	0	1	1	0
3	3	0	0	0	0	0	0	0	0	0	0	0	0	0	0	0	0	0	0	0	0	0	0	0	0	0	0	0	0	0	0	2	2	0	4	4	12	0	1	8	16	1	0	0	0	0	0	0	0
4	0	0	0	0	0	0	0	0	0	0	0	0	0	0	0	0	0	0	0	0	0	0	0	0	0	0	0	0	0	0	0	0	0	0	0	0	6	0	0	0	11	0	0	0	0	0	0	0	0
5	0	0	0	0	0	0	0	0	0	0	0	0	0	0	0	0	0	0	0	0	0	0	0	0	0	0	0	0	0	0	0	0	0	0	0	0	2	0	0	0	3	0	0	0	0	0	0	0	0
6	0	0	0	0	0	0	0	0	0	0	0	0	0	0	0	0	0	0	0	0	0	0	0	0	0	0	0	0	0	0	0	0	0	0	0	0	0	0	0	0	0	0	0	0	0	0	0	0	0
PN-3-m	32	0	1	5	0	0	16	0	0	0	1	2	0	1	0	0	0	0	0	8	0	0	0	0	0	2	0	1	0	0	0	5	1	0	16	24	89	21	12	22	51	18	0	0	0	2	2	66	0
1	15	0	1	1	0	0	4	0	0	0	1	0	0	0	0	0	0	0	0	2	0	0	0	0	0	0	0	0	0	0	0	0	0	0	3	1	24	5	3	0	15	4	0	0	0	0	0	13	0
2	14	0	0	4	0	0	11	0	0	0	0	2	0	1	0	0	0	0	0	6	0	0	0	0	0	2	0	1	0	0	0	5	0	0	9	15	42	16	4	12	20	14	0	0	0	2	2	34	0
3	3	0	0	0	0	0	1	0	0	0	0	0	0	0	0	0	0	0	0	0	0	0	0	0	0	0	0	0	0	0	0	0	1	0	2	8	16	0	1	10	10	0	0	0	0	0	0	13	0
4	0	0	0	0	0	0	0	0	0	0	0	0	0	0	0	0	0	0	0	0	0	0	0	0	0	0	0	0	0	0	0	0	0	0	2	0	5	0	4	0	5	0	0	0	0	0	0	5	0
5	0	0	0	0	0	0	0	0	0	0	0	0	0	0	0	0	0	0	0	0	0	0	0	0	0	0	0	0	0	0	0	0	0	0	0	0	2	0	0	0	1	0	0	0	0	0	0	1	0
6	0	0	0	0	0	0	0	0	0	0	0	0	0	0	0	0	0	0	0	0	0	0	0	0	0	0	0	0	0	0	0	0	0	0	0	0	0	0	0	0	0	0	0	0	0	0	0	0	0
PN-4-m	9	0	0	1	0	0	0	0	0	0	0	0	1	3	1	0	0	0	0	0	1	0	0	0	0	0	0	0	0	0	0	2	0	31	10	33	60	13	8	18	35	4	0	5	0	0	9	131	15
1	1	0	0	0	0	0	0	0	0	0	0	0	0	0	0	0	0	0	0	0	0	0	0	0	0	0	0	0	0	0	0	0	0	0	0	2	10	1	1	1	4	0	0	0	0	0	2	5	0
2	6	0	0	1	0	0	0	0	0	0	0	0	1	3	1	0	0	0	0	0	1	0	0	0	0	0	0	0	0	0	0	2	0	17	8	17	39	12	6	11	23	3	0	5	0	0	7	104	15
3	2	0	0	0	0	0	0	0	0	0	0	0	0	0	0	0	0	0	0	0	0	0	0	0	0	0	0	0	0	0	0	0	0	9	2	14	11	0	1	6	8	1	0	0	0	0	0	18	0
4	0	0	0	0	0	0	0	0	0	0	0	0	0	0	0	0	0	0	0	0	0	0	0	0	0	0	0	0	0	0	0	0	0	5	0	0	0	0	0	0	0	0	0	0	0	0	0	4	0
5	0	0	0	0	0	0	0	0	0	0	0	0	0	0	0	0	0	0	0	0	0	0	0	0	0	0	0	0	0	0	0	0	0	0	0	0	0	0	0	0	0	0	0	0	0	0	0	0	0
6	0	0	0	0	0	0	0	0	0	0	0	0	0	0	0	0	0	0	0	0	0	0	0	0	0	0	0	0	0	0	0	0	0	0	0	0	0	0	0	0	0	0	0	0	0	0	0	0	0
PN-5-m	14	0	0	0	0	59	0	0	0	0	0	0	0	2	0	0	0	0	0	0	0	0	0	0	0	0	0	0	0	0	0	2	0	6	5	17	10	8	6	12	7	4	26	0	0	0	2	210	4
1	5	0	0	0	0	10	0	0	0	0	0	0	0	2	0	0	0	0	0	0	0	0	0	0	0	0	0	0	0	0	0	0	0	0	1	1	2	0	1	1	1	0	8	0	0	0	0	11	0
2	9	0	0	0	0	38	0	0	0	0	0	0	0	0	0	0	0	0	0	0	0	0	0	0	0	0	0	0	0	0	0	2	0	6	4	12	8	8	2	6	6	4	14	0	0	0	2	125	4
3	0	0	0	0	0	11	0	0	0	0	0	0	0	0	0	0	0	0	0	0	0	0	0	0	0	0	0	0	0	0	0	0	0	0	0	4	0	0	3	5	0	0	4	0	0	0	0	56	0
4	0	0	0	0	0	0	0	0	0	0	0	0	0	0	0	0	0	0	0	0	0	0	0	0	0	0	0	0	0	0	0	0	0	0	0	0	0	0	0	0	0	0	0	0	0	0	0	14	0
5	0	0	0	0	0	0	0	0	0	0	0	0	0	0	0	0	0	0	0	0	0	0	0	0	0	0	0	0	0	0	0	0	0	0	0	0	0	0	0	0	0	0	0	0	0	0	0	4	0
6	0	0	0	0	0	0	0	0	0	0	0	0	0	0	0	0	0	0	0	0	0	0	0	0	0	0	0	0	0	0	0	0	0	0	0	0	0	0	0	0	0	0	0	0	0	0	0	0	0
PN-6-m	17	0	1	0	0	2	8	0	0	0	0	0	0	12	0	0	0	0	0	2	0	0	0	0	0	0	0	0	0	1	0	14	0	6	10	16	28	5	0	14	14	7	18	14	0	2	37	134	11
1	2	0	0	0	0	0	5	0	0	0	0	0	0	4	0	0	0	0	0	2	0	0	0	0	0	0	0	0	0	0	0	0	0	0	2	0	3	0	0	2	2	0	5	0	0	0	8	19	0
2	11	0	1	0	0	2	2	0	0	0	0	0	0	8	0	0	0	0	0	0	0	0	0	0	0	0	0	0	0	1	0	11	0	6	7	13	19	5	0	7	10	7	13	10	0	2	25	79	11
3	4	0	0	0	0	0	1	0	0	0	0	0	0	0	0	0	0	0	0	0	0	0	0	0	0	0	0	0	0	0	0	3	0	0	1	3	6	0	0	5	2	0	0	4	0	0	4	28	0
4	0	0	0	0	0	0	0	0	0	0	0	0	0	0	0	0	0	0	0	0	0	0	0	0	0	0	0	0	0	0	0	0	0	0	0	0	0	0	0	0	0	0	0	0	0	0	0	8	0
5	0	0	0	0	0	0	0	0	0	0	0	0	0	0	0	0	0	0	0	0	0	0	0	0	0	0	0	0	0	0	0	0	0	0	0	0	0	0	0	0	0	0	0	0	0	0	0	0	0
6	0	0	0	0	0	0	0	0	0	0	0	0	0	0	0	0	0	0	0	0	0	0	0	0	0	0	0	0	0	0	0	0	0	0	0	0	0	0	0	0	0	0	0	0	0	0	0	0	0
PN-7-m	23	0	2	5	1	2	25	0	2	0	2	0	0	13	1	0	1	0	0	13	0	4	0	7	0	7	0	1	0	0	0	12	0	0	22	20	81	12	14	8	34	6	15	0	0	0	0	13	49
1	8	0	0	0	0	0	7	0	0	0	0	0	0	3	0	0	0	0	0	6	0	0	0	0	0	0	0	1	0	0	0	4	0	0	7	6	14	0	0	0	4	0	3	0	0	0	0	4	13
2	14	0	2	5	1	2	15	0	2	0	2	0	0	10	1	0	1	0	0	7	0	4	0	7	0	3	0	0	0	0	0	8	0	0	11	8	33	12	6	4	15	6	7	0	0	0	0	9	24
3	0	0	0	0	0	0	3	0	0	0	0	0	0	0	0	0	0	0	0	0	0	0	0	0	0	4	0	0	0	0	0	0	0	0	4	6	21	0	4	4	11	0	5	0	0	0	0	0	8
4	1	0	0	0	0	0	0	0	0	0	0	0	0	0	0	0	0	0	0	0	0	0	0	0	0	0	0	0	0	0	0	0	0	0	0	0	13	0	4	0	4	0	0	0	0	0	0	0	4
5	0	0	0	0	0	0	0	0	0	0	0	0	0	0	0	0	0	0	0	0	0	0	0	0	0	0	0	0	0	0	0	0	0	0	0	0	0	0	0	0	0	0	0	0	0	0	0	0	0
6	0	0	0	0	0	0	0	0	0	0	0	0	0	0	0	0	0	0	0	0	0	0	0	0	0	0	0	0	0	0	0	0	0	0	0	0	0	0	0	0	0	0	0	0	0	0	0	0	0
PN-8-m	24	0	3	0	0	1	1	2	1	0	0	0	0	26	0	3	0	0	0	5	0	0	0	0	0	0	0	0	0	0	0	21	0	0	17	89	49	15	16	48	17	16	3	4	1	0	12	2	22
1	7	0	0	0	0	0	1	0	0	0	0	0	0	4	0	0	0	0	0	2	0	0	0	0	0	0	0	0	0	0	0	4	0	0	3	9	7	0	1	1	0	0	0	0	0	0	9	0	2
2	15	0	3	0	0	1	0	2	1	0	0	0	0	18	0	2	0	0	0	3	0	0	0	0	0	0	0	0	0	0	0	13	0	0	5	24	17	7	9	13	5	11	2	0	0	0	0	0	11
3	1	0	0	0	0	0	0	0	0	0	0	0	0	4	0	0	0	0	0	0	0	0	0	0	0	0	0	0	0	0	0	3	0	0	9	33	12	8	6	20	7	4	1	0	1	0	2	1	8
4	1	0	0	0	0	0	0	0	0	0	0	0	0	0	0	1	0	0	0	0	0	0	0	0	0	0	0	0	0	0	0	1	0	0	0	23	7	0	0	5	5	0	0	0	0	0	0	0	1
5	0	0	0	0	0	0	0	0	0	0	0	0	0	0	0	0	0	0	0	0	0	0	0	0	0	0	0	0	0	0	0	0	0	0	0	0	6	0	0	9	0	1	0	4	0	0	1	1	0
6	0	0	0	0	0	0	0	0	0	0	0	0	0	0	0	0	0	0	0	0	0	0	0	0	0	0	0	0	0	0	0	0	0	0	0	0	0	0	0	0	0	0	0	0	0	0	0	0	0
PN-9-m	47	5	6	0	0	0	26	0	0	0	1	0	0	17	0	1	0	0	0	10	0	0	3	0	0	1	0	2	0	0	0	18	0	0	12	68	27	11	18	55	23	4	12	1	0	0	7	10	6
1	13	0	0	0	0	0	1	0	0	0	0	0	0	0	0	0	0	0	0	0	0	0	0	0	0	0	0	0	0	0	0	0	0	0	0	0	0	0	0	0	0	0	0	0	0	0	3	0	0
2	19	3	1	0	0	0	17	0	0	0	0	0	0	9	0	0	0	0	0	10	0	0	0	0	0	1	0	2	0	0	0	9	0	0	2	11	6	7	3	5	1	3	4	0	0	0	4	0	3
3	13	2	3	0	0	0	8	0	0	0	0	0	0	5	0	1	0	0	0	0	0	0	3	0	0	0	0	0	0	0	0	7	0	0	4	20	4	4	15	24	9	1	6	0	0	0	0	10	3
4	2	0	0	0	0	0	0	0	0	0	1	0	0	3	0	0	0	0	0	0	0	0	0	0	0	0	0	0	0	0	0	2	0	0	5	37	15	0	0	24	9	0	2	1	0	0	0	0	0
5	0	0	2	0	0	0	0	0	0	0	0	0	0	0	0	0	0	0	0	0	0	0	0	0	0	0	0	0	0	0	0	0	0	0	1	0	2	0	0	2	4	0	0	0	0	0	0	0	0
6	0	0	0	0	0	0	0	0	0	0	0	0	0	0	0	0	0	0	0	0	0	0	0	0	0	0	0	0	0	0	0	0	0	0	0	0	0	0	0	0	0	0	0	0	0	0	0	0	0
PN-10-m	15	0	2	1	0	0	9	0	0	0	0	0	0	10	0	0	0	0	0	4	0	0	0	0	0	0	0	4	0	0	2	9	0	1	21	59	76	14	21	49	31	6	12	0	1	1	18	6	10
1	2	0	0	0	0	0	0	0	0	0	0	0	0	0	0	0	0	0	0	0	0	0	0	0	0	0	0	0	0	0	0	0	0	0	0	1	1	0	1	2	0	0	2	0	0	0	5	0	0
2	8	0	0	0	0	0	5	0	0	0	0	0	0	7	0	0	0	0	0	4	0	0	0	0	0	0	0	0	0	0	2	7	0	1	9	23	32	14	7	19	11	5	3	0	1	0	8	1	6
3	5	0	2	0	0	0	4	0	0	0	0	0	0	3	0	0	0	0	0	0	0	0	0	0	0	0	0	4	0	0	0	2	0	0	12	19	30	0	9	22	18	1	4	0	0	1	4	5	4
4	0	0	0	1	0	0	0	0	0	0	0	0	0	0	0	0	0	0	0	0	0	0	0	0	0	0	0	0	0	0	0	0	0	0	0	10	8	0	4	6	2	0	3	0	0	0	1	0	0
5	0	0	0	0	0	0	0	0	0	0	0	0	0	0	0	0	0	0	0	0	0	0	0	0	0	0	0	0	0	0	0	0	0	0	0	3	5	0	0	0	0	0	0	0	0	0	0	0	0
6	0	0	0	0	0	0	0	0	0	0	0	0	0	0	0	0	0	0	0	0	0	0	0	0	0	0	0	0	0	0	0	0	0	0	0	3	0	0	0	0	0	0	0	0	0	0	0	0	0
PN-11-m	38	0	0	0	0	2	9	2	0	0	0	0	0	12	0	0	0	0	1	4	0	0	0	0	0	0	0	0	0	0	0	13	0	0	15	24	96	4	16	0	73	5	29	3	0	2	3	15	4
1	10	0	0	0	0	0	1	0	0	0	0	0	0	3	0	0	0	0	0	1	0	0	0	0	0	0	0	0	0	0	0	0	0	0	3	5	13	0	1	0	10	0	3	0	0	0	1	1	0
2	18	0	0	0	0	0	7	2	0	0	0	0	0	6	0	0	0	0	0	3	0	0	0	0	0	0	0	0	0	0	0	8	0	0	3	7	35	4	5	0	24	5	8	2	0	0	2	4	2
3	3	0	0	0	0	2	0	0	0	0	0	0	0	3	0	0	0	0	0	0	0	0	0	0	0	0	0	0	0	0	0	5	0	0	3	8	27	0	9	0	28	0	12	1	0	2	0	6	0
4	2	0	0	0	0	0	1	0	0	0	0	0	0	0	0	0	0	0	0	0	0	0	0	0	0	0	0	0	0	0	0	0	0	0	6	3	15	0	1	0	8	0	5	0	0	0	0	4	2
5	5	0	0	0	0	0	0	0	0	0	0	0	0	0	0	0	0	0	1	0	0	0	0	0	0	0	0	0	0	0	0	0	0	0	0	1	6	0	0	0	3	0	1	0	0	0	0	0	0
6	0	0	0	0	0	0	0	0	0	0	0	0	0	0	0	0	0	0	0	0	0	0	0	0	0	0	0	0	0	0	0	0	0	0	0	0	0	0	0	0	0	0	0	0	0	0	0	0	0
	*Key to Grain Shape Categories. 1 = very angular; 2 = angular; 3 = sub-angular; 4 = subrounded; 5 = rounded; 6 = well rounded; Vc: very coarse sand fraction; C: coarse sand fraction; m: medium sand fraction; f: fine sand fraction; Vf: very fine sand fraction.
[truncated: 8 more columns]

## Sheet: STROMBOLI
SAMPLE	P	P inLvlblgl	P inLvlbrgl	P inLvlorgl	P inLvlgrgl	P inLvlclgl	P alt	Py	Py in Lvlblgl	Py in Lvlbrgl	Py in Lvlorgl	Py in Lvlgrgl	Py alt	K	K in Lvlblgl	K in Lvlbrgl	K in Lvlorgl	Ol	Ol inLvlblgl	Ol inLvlbrgl	Ol inLvlorgl	Ol inLvlgrgl	Ol alt	Lvlblgl	Lvlbrgl	Lvlorgl	Lvlgrgl	Lvlclgl	Lvmiblgl	Lvmibrgl	Lvmiorgl	Lvmigrgl	Lvmiclgl	Lvvblgl	Lvvbrgl	Lvvorgl	Lvvgrgl	Lvvclgl	Lvalt	Lvf	Pmcl	Lvo	Lsc (spar)	Lsc (micr)	Hb	D(Op)	Und	TOT
STR-1-Vc	4	78	9	0	2	0	0	23	13	3	0	0	0	1	9	0	0	6	22	2	0	0	0	87	11	0	7	0	0	0	0	0	0	8	0	0	0	0	0	0	0	2	0	0	0	0	0	287
1	0	18	1	0	0	0	0	2	3	0	0	0	0	0	1	0	0	0	4	0	0	0	0	20	2	0	1	0	0	0	0	0	0	0	0	0	0	0	0	0	0	0	0	0	0	0	0	52
2	3	32	6	0	0	0	0	9	5	2	0	0	0	0	3	0	0	2	10	0	0	0	0	30	5	0	4	0	0	0	0	0	0	5	0	0	0	0	0	0	0	1	0	0	0	0	0	117
3	1	20	2	0	0	0	0	7	3	1	0	0	0	1	3	0	0	1	6	2	0	0	0	23	3	0	1	0	0	0	0	0	0	1	0	0	0	0	0	0	0	1	0	0	0	0	0	76
4	0	8	0	0	1	0	0	5	2	0	0	0	0	0	2	0	0	3	2	0	0	0	0	10	0	0	1	0	0	0	0	0	0	2	0	0	0	0	0	0	0	0	0	0	0	0	0	36
5	0	0	0	0	1	0	0	0	0	0	0	0	0	0	0	0	0	0	0	0	0	0	0	3	1	0	0	0	0	0	0	0	0	0	0	0	0	0	0	0	0	0	0	0	0	0	0	5
6	0	0	0	0	0	0	0	0	0	0	0	0	0	0	0	0	0	0	0	0	0	0	0	1	0	0	0	0	0	0	0	0	0	0	0	0	0	0	0	0	0	0	0	0	0	0	0	1
STR-1-C	6	81	2	0	0	0	0	48	33	1	0	0	0	2	10	0	0	5	16	3	0	0	0	128	13	0	5	1	23	2	0	1	0	20	0	0	0	0	0	0	0	0	0	0	0	0	0	400
1	0	3	0	0	0	0	0	8	0	0	0	0	0	0	0	0	0	1	0	0	0	0	0	10	4	0	0	0	4	0	0	0	0	1	0	0	0	0	0	0	0	0	0	0	0	0	0	31
2	5	57	2	0	0	0	0	33	28	1	0	0	0	2	8	0	0	3	7	2	0	0	0	66	6	0	3	1	12	2	0	1	0	13	0	0	0	0	0	0	0	0	0	0	0	0	0	252
3	1	16	0	0	0	0	0	7	5	0	0	0	0	0	2	0	0	0	3	0	0	0	0	40	3	0	2	0	7	0	0	0	0	6	0	0	0	0	0	0	0	0	0	0	0	0	0	92
4	0	5	0	0	0	0	0	0	0	0	0	0	0	0	0	0	0	1	6	1	0	0	0	9	0	0	0	0	0	0	0	0	0	0	0	0	0	0	0	0	0	0	0	0	0	0	0	22
5	0	0	0	0	0	0	0	0	0	0	0	0	0	0	0	0	0	0	0	0	0	0	0	3	0	0	0	0	0	0	0	0	0	0	0	0	0	0	0	0	0	0	0	0	0	0	0	3
6	0	0	0	0	0	0	0	0	0	0	0	0	0	0	0	0	0	0	0	0	0	0	0	0	0	0	0	0	0	0	0	0	0	0	0	0	0	0	0	0	0	0	0	0	0	0	0	0
STR-1-m	11	36	2	0	0	0	0	46	9	3	0	0	0	0	6	16	0	28	11	3	0	0	0	73	9	0	3	0	58	7	0	9	0	60	0	0	1	2	1	2	0	0	2	1	1	0	0	400
1	0	0	0	0	0	0	0	1	0	0	0	0	0	0	0	0	0	1	0	0	0	0	0	2	0	0	0	0	0	0	0	0	0	3	0	0	0	0	0	0	0	0	0	0	0	0	0	7
2	7	15	0	0	0	0	0	26	5	1	0	0	0	0	3	3	0	17	2	1	0	0	0	27	4	0	0	0	17	1	0	0	0	20	0	0	1	2	0	1	0	0	1	0	1	0	0	155
3	4	12	2	0	0	0	0	12	2	0	0	0	0	0	2	9	0	7	6	2	0	0	0	18	2	0	1	0	18	3	0	1	0	17	0	0	0	0	1	1	0	0	0	0	0	0	0	120
4	0	8	0	0	0	0	0	5	2	1	0	0	0	0	1	4	0	2	2	0	0	0	0	22	1	0	1	0	18	2	0	3	0	13	0	0	0	0	0	0	0	0	1	1	0	0	0	87
5	0	1	0	0	0	0	0	2	0	1	0	0	0	0	0	0	0	1	1	0	0	0	0	4	2	0	1	0	5	1	0	5	0	7	0	0	0	0	0	0	0	0	0	0	0	0	0	31
6	0	0	0		0	0	0	0	0	0	0	0	0	0	0	0	0	0	0	0	0	0	0	0	0	0	0	0	0	0	0	0	0	0	0	0	0	0	0	0	0	0	0	0	0	0	0	0
STR-1-f	38	30	4	0	0	0	0	72	5	0	0	0	0	12	0	0	0	19	3	0	0	0	0	48	7	0	1	0	75	13	0	7	0	60	1	0	1	0	0	0	1	0	0	0	0	3	0	400
1	4	1	0	0	0	0	0	8	0	0	0	0	0	0	0	0	0	2	0	0	0	0	0	0	0	0	0	0	6	0	0	0	0	15	1	0	0	0	0	0	0	0	0	0	0	0	0	37
2	31	14	4	0	0	0	0	58	4	0	0	0	0	9	0	0	0	13	2	0	0	0	0	35	4	0	1	0	38	11	0	4	0	29	0	0	1	0	0	0	0	0	0	0	0	3	0	261
3	3	13	0	0	0	0	0	6	1	0	0	0	0	3	0	0	0	3	1	0	0	0	0	12	3	0	0	0	20	2	0	2	0	14	0	0	0	0	0	0	1	0	0	0	0	0	0	84
4	0	2	0	0	0	0	0	0	0	0	0	0	0	0	0	0	0	1	0	0	0	0	0	1	0	0	0	0	11	0	0	1	0	2	0	0	0	0	0	0	0	0	0	0	0	0	0	18
5	0	0	0	0	0	0	0	0	0	0	0	0	0	0	0	0	0	0	0	0	0	0	0	0	0	0	0	0	0	0	0	0	0	0	0	0	0	0	0	0	0	0	0	0	0	0	0	0
6	0	0	0	0	0	0	0	0	0	0	0	0	0	0	0	0	0	0	0	0	0	0	0	0	0	0	0	0	0	0	0	0	0	0	0	0	0	0	0	0	0	0	0	0	0	0	0	0
STR-1-Vf	54	2	0	0	0	0	0	128	0	0	0	0	0	15	0	0	0	52	2	1	0	0	0	14	0	0	0	0	48	21	0	2	0	47	5	1	0	1	0	1	1	0	0	0	2	3	0	400
1	15	0	0	0	0	0	0	37	0	0	0	0	0	1	0	0	0	19	0	0	0	0	0	2	0	0	0	0	6	1	0	0	0	15	1	0	0	0	0	0	1	0	0	0	0	0	0	98
2	31	1	0	0	0	0	0	79	0	0	0	0	0	9	0	0	0	22	1	1	0	0	0	8	0	0	0	0	27	15	0	2	0	24	4	1	0	1	0	1	0	0	0	0	2	0	0	229
3	5	1	0	0	0	0	0	12	0	0	0	0	0	5	0	0	0	7	1	0	0	0	0	4	0	0	0	0	13	5	0	0	0	7	0	0	0	0	0	0	0	0	0	0	0	3	0	63
4	3	0	0	0	0	0	0	0	0	0	0	0	0	0	0	0	0	4	0	0	0	0	0	0	0	0	0	0	2	0	0	0	0	1	0	0	0	0	0	0	0	0	0	0	0	0	0	10
5	0	0	0	0	0	0	0	0	0	0	0	0	0	0	0	0	0	0	0	0	0	0	0	0	0	0	0	0	0	0	0	0	0	0	0	0	0	0	0	0	0	0	0	0	0	0	0	0
6	0	0	0	0	0	0	0	0	0	0	0	0	0	0	0	0	0	0	0	0	0	0	0	0	0	0	0	0	0	0	0	0	0	0	0	0	0	0	0	0	0	0	0	0	0	0	0	0
STR-2-m	3	9	3	0	0	0	0	189	21	1	0	0	0	0	0	0	0	70	28	7	0	0	0	33	3	0	3	0	10	4	0	2	0	10	0	0	0	1	0	0	0	0	0	0	0	3	0	400
1	0	0	0	0	0	0	0	3	0	0	0	0	0	0	0	0	0	0	0	0	0	0	0	0	0	0	0	0	0	0	0	0	0	0	0	0	0	0	0	0	0	0	0	0	0	0	0	3
2	2	5	1	0	0	0	0	86	1	0	0	0	0	0	0	0	0	16	3	0	0	0	0	15	0	0	0	0	2	0	0	2	0	2	0	0	0	1	0	0	0	0	0	0	0	0	0	136
3	1	3	2	0	0	0	0	58	19	1	0	0	0	0	0	0	0	8	3	0	0	0	0	5	3	0	3	0	3	4	0	0	0	3	0	0	0	0	0	0	0	0	0	0	0	0	0	116
4	0	1	0	0	0	0	0	40	1	0	0	0	0	0	0	0	0	29	10	5	0	0	0	7	0	0	0	0	5	0	0	0	0	1	0	0	0	0	0	0	0	0	0	0	0	3	0	102
5	0	0	0	0	0	0	0	2	0	0	0	0	0	0	0	0	0	17	12	2	0	0	0	6	0	0	0	0	0	0	0	0	0	4	0	0	0	0	0	0	0	0	0	0	0	0	0	43
6	0	0	0	0	0	0	0	0	0	0	0	0	0	0	0	0	0	0	0	0	0	0	0	0	0	0	0	0	0	0	0	0	0	0	0	0	0	0	0	0	0	0	0	0	0	0	0	0
STR-3-m	15	57	8	0	8	0	2	50	12	1	1	0	2	5	1	0	0	4	1	0	0	0	0	112	25	1	17	2	56	3	0	2	0	7	0	0	0	0	0	0	0	8	0	0	0	0	0	400
1	0	2	0	0	0	0	0	2	0	0	0	0	0	0	0	0	0	0	0	0	0	0	0	0	0	0	0	0	0	0	0	0	0	0	0	0	0	0	0	0	0	0	0	0	0	0	0	4
2	10	22	6	0	0	0	0	22	5	0	1	0	0	0	1	0	0	3	0	0	0	0	0	33	10	1	5	0	18	0	0	0	0	5	0	0	0	0	0	0	0	1	0	0	0	0	0	143
3	5	24	2	0	6	0	0	18	7	1	0	0	2	5	0	0	0	0	1	0	0	0	0	50	12	0	9	2	32	3	0	1	0	1	0	0	0	0	0	0	0	3	0	0	0	0	0	184
4	0	9	0	0	2	0	2	8	0	0	0	0	0	0	0	0	0	1	0	0	0	0	0	22	3	0	3	0	6	0	0	1	0	1	0	0	0	0	0	0	0	4	0	0	0	0	0	62
5	0	0	0	0	0	0	0	0	0	0	0	0	0	0	0	0	0	0	0	0	0	0	0	7	0	0	0	0	0	0	0	0	0	0	0	0	0	0	0	0	0	0	0	0	0	0	0	7
6	0	0	0	0	0	0	0	0	0	0	0	0	0	0	0	0	0	0	0	0	0	0	0	0	0	0	0	0	0	0	0	0	0	0	0	0	0	0	0	0	0	0	0	0	0	0	0	0
STR-4-m	14	49	15	0	6	1	1	62	13	1	0	1	0	6	0	0	0	2	2	0	0	0	1	86	29	0	23	0	49	8	0	2	0	20	3	0	0	0	0	0	0	6	0	0	0	0	0	400
1	3	0	0	0	0	0	0	0	0	0	0	0	0	0	0	0	0	0	0	0	0	0	0	0	0	0	0	0	0	0	0	0	0	0	0	0	0	0	0	0	0	0	0	0	0	0	0	3
2	10	26	11	0	1	0	0	32	6	1	0	0	0	4	0	0	0	2	1	0	0	0	0	43	10	0	4	0	21	4	0	2	0	13	2	0	0	0	0	0	0	4	0	0	0	0	0	197
3	1	18	4	0	5	1	0	25	5	0	0	0	0	2	0	0	0	0	1	0	0	0	0	32	16	0	14	0	23	4	0	0	0	6	1	0	0	0	0	0	0	2	0	0	0	0	0	160
4	0	5	0	0	0	0	1	5	2	0	0	1	0	0	0	0	0	0	0	0	0	0	1	10	3	0	5	0	5	0	0	0	0	1	0	0	0	0	0	0	0	0	0	0	0	0	0	39
5	0	0	0	0	0	0	0	0	0	0	0	0	0	0	0	0	0	0	0	0	0	0	0	1	0	0	0	0	0	0	0	0	0	0	0	0	0	0	0	0	0	0	0	0	0	0	0	1
6	0	0	0	0	0	0	0	0	0	0	0	0	0	0	0	0	0	0	0	0	0	0	0	0	0	0	0	0	0	0	0	0	0	0	0	0	0	0	0	0	0	0	0	0	0	0	0	0
STR-5-m	16	47	15	0	4	0	0	44	23	2	0	0	0	6	2	0	0	10	11	4	0	0	1	79	12	0	9	0	52	11	0	7	0	36	3	0	0	0	3	0	0	0	0	0	0	0	3	400
1	1	1	0	0	0	0	0	6	0	2	0	0	0	0	0	0	0	2	0	2	0	0	0	2	2	0	0	0	2	0	0	0	0	1	1	0	0	0	0	0	0	0	0	0	0	0	0	22
2	11	14	10	0	1	0	0	17	12	0	0	0	0	3	2	0	0	6	6	1	0	0	0	30	6	0	1	0	15	5	0	1	0	10	0	0	0	0	0	0	0	0	0	0	0	0	3	154
3	3	26	5	0	2	0	0	16	9	0	0	0	0	3	0	0	0	1	3	1	0	0	0	31	2	0	6	0	24	6	0	6	0	16	0	0	0	0	1	0	0	0	0	0	0	0	0	161
4	1	6	0	0	1	0	0	5	2	0	0	0	0	0	0	0	0	0	1	0	0	0	1	16	2	0	2	0	11	0	0	0	0	9	2	0	0	0	2	0	0	0	0	0	0	0	0	61
5	0	0	0	0	0	0	0	0	0	0	0	0	0	0	0	0	0	1	1	0	0	0	0	0	0	0	0	0	0	0	0	0	0	0	0	0	0	0	0	0	0	0	0	0	0	0	0	2
6	0	0	0	0	0	0	0	0	0	0	0	0	0	0	0	0	0	0	0	0	0	0	0	0	0	0	0	0	0	0	0	0	0	0	0	0	0	0	0	0	0	0	0	0	0	0	0	0
STR-7-m	18	55	15	0	6	0	0	39	13	1	0	0	1	2	2	0	0	4	14	1	0	0	1	76	29	1	10	0	48	18	0	15	2	22	1	0	0	0	1	0	0	4	0	0	0	0	1	400
1	3	3	0	0	0	0	0	6	0	0	0	0	0	0	0	0	0	0	0	0	0	0	0	0	0	0	0	0	2	0	0	0	0	2	0	0	0	0	0	0	0	0	0	0	0	0	0	16
2	9	30	13	0	2	0	0	27	9	1	0	0	0	1	2	0	0	3	7	1	0	0	0	44	17	1	4	0	22	9	0	8	2	13	0	0	0	0	1	0	0	2	0	0	0	0	1	229
3	6	19	2	0	3	0	0	6	4	0	0	0	1	1	0	0	0	1	7	0	0	0	1	24	10	0	3	0	21	7	0	7	0	6	1	0	0	0	0	0	0	2	0	0	0	0	0	132
4	0	3	0	0	1	0	0	0	0	0	0	0	0	0	0	0	0	0	0	0	0	0	0	8	2	0	3	0	3	2	0	0	0	1	0	0	0	0	0	0	0	0	0	0	0	0	0	23
5	0	0	0	0	0	0	0	0	0	0	0	0	0	0	0	0	0	0	0	0	0	0	0	0	0	0	0	0	0	0	0	0	0	0	0	0	0	0	0	0	0	0	0	0	0	0	0	0
6	0	0	0	0	0	0	0	0	0	0	0	0	0	0	0	0	0	0	0	0	0	0	0	0	0	0	0	0	0	0	0	0	0	0	0	0	0	0	0	0	0	0	0	0	0	0	0	0
STR-8-m	10	32	18	1	2	0	0	90	17	6	0	0	0	5	5	2	0	8	5	2	0	1	1	76	38	0	14	0	36	8	0	3	0	18	2	0	0	0	0	0	0	0	0	0	0	0	0	400
1	3	3	1	0	0	0	0	16	0	0	0	0	0	0	0	0	0	2	0	0	0	0	0	4	0	0	0	0	2	0	0	0	0	5	0	0	0	0	0	0	0	0	0	0	0	0	0	36
2	5	17	12	1	1	0	0	53	14	2	0	0	0	4	5	2	0	6	3	2	0	1	0	33	15	0	10	0	18	5	0	3	0	10	1	0	0	0	0	0	0	0	0	0	0	0	0	223
3	2	9	5	0	1	0	0	18	3	3	0	0	0	1	0	0	0	0	1	0	0	0	0	26	15	0	3	0	15	3	0	0	0	3	1	0	0	0	0	0	0	0	0	0	0	0	0	109
4	0	2	0	0	0	0	0	3	0	1	0	0	0	0	0	0	0	0	1	0	0	0	1	12	7	0	1	0	1	0	0	0	0	0	0	0	0	0	0	0	0	0	0	0	0	0	0	29
5	0	1	0	0	0	0	0	0	0	0	0	0	0	0	0	0	0	0	0	0	0	0	0	1	1	0	0	0	0	0	0	0	0	0	0	0	0	0	0	0	0	0	0	0	0	0	0	3
6	0	0	0	0	0	0	0	0	0	0	0	0	0	0	0	0	0	0	0	0	0	0	0	0	0	0	0	0	0	0	0	0	0	0	0	0	0	0	0	0	0	0	0	0	0	0	0	0
STR-9-Vc	0	28	49	3	0	0	0	9	15	22	7	0	0	0	0	4	1	0	1	11	0	0	0	39	76	5	0	0	3	10	1	0	0	3	13	0	0	0	0	0	0	0	0	0	0	0	0	300
1	0	15	36	2	0	0	0	7	8	21	5	0	0	0	0	1	1	0	1	11	0	0	0	32	58	5	0	0	3	5	0	0	0	2	9	0	0	0	0	0	0	0	0	0	0	0	0	222
2	0	8	13	1	0	0	0	2	7	1	2	0	0	0	0	3	0	0	0	0	0	0	0	7	18	0	0	0	0	4	1	0	0	1	4	0	0	0	0	0	0	0	0	0	0	0	0	72
3	0	4	0	0	0	0	0	0	0	0	0	0	0	0	0	0	0	0	0	0	0	0	0	0	0	0	0	0	0	1	0	0	0	0	0	0	0	0	0	0	0	0	0	0	0	0	0	5
4	0	1	0	0	0	0	0	0	0	0	0	0	0	0	0	0	0	0	0	0	0	0	0	0	0	0	0	0	0	0	0	0	0	0	0	0	0	0	0	0	0	0	0	0	0	0	0	1
5	0	0	0	0	0	0	0	0	0	0	0	0	0	0	0	0	0	0	0	0	0	0	0	0	0	0	0	0	0	0	0	0	0	0	0	0	0	0	0	0	0	0	0	0	0	0	0	0
6	0	0	0	0	0	0	0	0	0	0	0	0	0	0	0	0	0	0	0	0	0	0	0	0	0	0	0	0	0	0	0	0	0	0	0	0	0	0	0	0	0	0	0	0	0	0	0	0
STR-9-C	1	91	64	3	0	0	1	6	6	4	0	0	0	0	4	1	0	1	4	6	0	0	0	90	52	7	0	0	18	12	0	0	0	21	8	0	0	0	0	0	0	0	0	0	0	0	0	400
1	0	44	40	2	0	0		3	2	0	0	0	0	0	3	1	0	0	4	4	0	0	0	45	27	5	0	0	10	6	0	0	0	19	5	0	0	0	0	0	0	0	0	0	0	0	0	220
2	1	35	14	1	0	0	0	3	2	3	0	0	0	0	1	0	0	1	0	1	0	0	0	26	19	2	0	0	7	5	0	0	0	2	3	0	0	0	0	0	0	0	0	0	0	0	0	126
3	0	11	9	0	0	0	1	0	2	1	0	0	0	0	0	0	0	0	0	0	0	0	0	14	5	0	0	0	1	1	0	0	0	0	0	0	0	0	0	0	0	0	0	0	0	0	0	45
4	0	1	1	0	0	0	0	0	0	0	0	0	0	0	0	0	0	0	0	1	0	0	0	4	1	0	0	0	0	0	0	0	0	0	0	0	0	0	0	0	0	0	0	0	0	0	0	8
5	0	0	0	0	0	0	0	0	0	0	0	0	0	0	0	0	0	0	0	0	0	0	0	1	0	0	0	0	0	0	0	0	0	0	0	0	0	0	0	0	0	0	0	0	0	0	0	1
6	0	0	0	0	0	0	0	0	0	0	0	0	0	0	0	0	0	0	0	0	0	0	0	0	0	0	0	0	0	0	0	0	0	0	0	0	0	0	0	0	0	0	0	0	0	0	0	0
STR-9-m	19	62	29	4	1	0	1	15	8	3	1	0	0	2	3	2	1	4	0	3	1	0	0	83	37	2	0	0	44	23	1	0	0	34	14	2	0	0	1	0	0	0	0	0	0	0	0	400
1	1	9	10	1	0	0	0	1	1	2	0	0	0	0	0	0	1	1	0	0	1	0	0	19	8	2	0	0	10	6	0	0	0	11	5	2	0	0	0	0	0	0	0	0	0	0	0	91
2	15	28	19	1	1	0	0	10	6	0	1	0	0	2	3	2	0	2	0	3	0	0	0	36	21	0	0	0	26	12	1	0	0	18	8	0	0	0	0	0	0	0	0	0	0	0	0	215
3	3	23	0	2	0	0	1	3	1	1	0	0	0	0	0	0	0	0	0	0	0	0	0	26	7	0	0	0	7	5	0	0	0	5	1	0	0	0	1	0	0	0	0	0	0	0	0	86
4	0	2	0	0	0	0	0	1	0	0	0	0	0	0	0	0	0	1	0	0	0	0	0	2	1	0	0	0	1	0	0	0	0	0	0	0	0	0	0	0	0	0	0	0	0	0	0	8
5	0	0	0	0	0	0	0	0	0	0	0	0	0	0	0	0	0	0	0	0	0	0	0	0	0	0	0	0	0	0	0	0	0	0	0	0	0	0	0	0	0	0	0	0	0	0	0	0
6	0	0	0	0	0	0	0	0	0	0	0	0	0	0	0	0	0	0	0	0	0	0	0	0	0	0	0	0	0	0	0	0	0	0	0	0	0	0	0	0	0	0	0	0	0	0	0	0
STR-9-f	31	38	21	1	0	0	1	27	7	0	0	0	0	6	2	0	0	6	2	0	0	0	2	42	31	2	0	0	69	35	3	0	0	51	19	3	0	0	1	0	0	0	0	0	0	0	0	400
1	6	6	3	1	0	0	0	9	0	0	0	0	0	1	0	0	0	3	0	0	0	0	0	5	7	0	0	0	28	13	2	0	0	26	9	2	0	0	0	0	0	0	0	0	0	0	0	121
2	20	16	18	0	0	0	1	16	4	0	0	0	0	3	2	0	0	3	2	0	0	0	0	31	22	2	0	0	32	15	1	0	0	20	7	1	0	0	0	0	0	0	0	0	0	0	0	216
3	5	15	0	0	0	0	0	2	3	0	0	0	0	2	0	0	0	0	0	0	0	0	2	6	2	0	0	0	9	7	0	0	0	5	3	0	0	0	1	0	0	0	0	0	0	0	0	62
4	0	1	0	0	0	0	0	0	0	0	0	0	0	0	0	0	0	0	0	0	0	0	0	0	0	0	0	0	0	0	0	0	0	0	0	0	0	0	0	0	0	0	0	0	0	0	0	1
5	0	0	0	0	0	0	0	0	0	0	0	0	0	0	0	0	0	0	0	0	0	0	0	0	0	0	0	0	0	0	0	0	0	0	0	0	0	0	0	0	0	0	0	0	0	0	0	0
6	0	0	0	0	0	0	0	0	0	0	0	0	0	0	0	0	0	0	0	0	0	0	0	0	0	0	0	0	0	0	0	0	0	0	0	0	0	0	0	0	0	0	0	0	0	0	0	0
STR-9-Vf	30	10	9	0	0	0	4	21	1	0	0	0	0	4	0	0	0	9	1	0	0	0	0	10	11	3	0	0	49	35	4	0	0	114	61	13	0	2	4	0	0	0	0	0	0	0	5	400
1	3	1	1	0	0	0	0	0	0	0	0	0	0	0	0	0	0	3	0	0	0	0	0	0	2	0	0	0	15	8	3	0	0	42	24	5	0	0	0	0	0	0	0	0	0	0	3	110
2	23	6	8	0	0	0	4	19	1	0	0	0	0	2	0	0	0	4	1	0	0	0	0	6	8	3	0	0	29	20	1	0	0	60	26	4	0	2	0	0	0	0	0	0	0	0	2	229
3	4	3	0	0	0	0	0	2	0	0	0	0	0	2	0	0	0	2	0	0	0	0	0	3	1	0	0	0	5	7	0	0	0	12	11	4	0	0	4	0	0	0	0	0	0	0	0	60
4	0	0	0	0	0	0	0	0	0	0	0	0	0	0	0	0	0	0	0	0	0	0	0	1	0	0	0	0	0	0	0	0	0	0	0	0	0	0	0	0	0	0	0	0	0	0	0	1
5	0	0	0	0	0	0	0	0	0	0	0	0	0	0	0	0	0	0	0	0	0	0	0	0	0	0	0	0	0	0	0	0	0	0	0	0	0	0	0	0	0	0	0	0	0	0	0	0
6	0	0	0	0	0	0	0	0	0	0	0	0	0	0	0	0	0	0	0	0	0	0	0	0	0	0	0	0	0	0	0	0	0	0	0	0	0	0	0	0	0	0	0	0	0	0	0	0
	*Key to Grain Shape Categories. 1 = very angular; 2 = angular; 3 = sub-angular; 4 = subrounded; 5 = rounded; 6 = well rounded; Vc: very coarse sand fraction; C: coarse sand fraction; m: medium sand fraction; f: fine sand fraction; Vf: very fine sand fraction.
